# Supplementary material for: Dual Agents: Fungal Macrocidins and Synthetic Analogues with Herbicidal and Antibiofilm Activities
Source: MDPI journal article supplement (doi:10.3390/antibiotics10081022), 2021-08-23
Supplement: s1 [file s1]

## Supporting Information

# Dual agents: fungal macrocidins and synthetic analogues with herbicidal and antibiofilm activities

Laura Treiber<sup>1</sup>, Christine Pezolt<sup>1</sup>, Haoxuan Zeng<sup>2,3</sup>, Hedda Schrey<sup>2,3</sup>, Stefan Jungwirth<sup>4</sup>, Aditya Shekhar<sup>4</sup>, Marc Stadler<sup>2,3</sup>, Ursula Bilitewski<sup>4</sup>, Maike Erb-Brinkmann<sup>5</sup>, Rainer Schobert<sup>1,\*</sup>

<sup>1</sup> Department of Chemistry, University Bayreuth, Universitaetsstrasse 30, 95440 Bayreuth, Germany

<sup>2</sup> Department of Microbial Drugs, Helmholtz Centre for Infection Research GmbH, Inhoffenstrasse 7, 38124 Braunschweig, Germany

<sup>3</sup> Institute of Microbiology, Technische Universität Braunschweig, Spielmannstraße 7, 38106 Braunschweig, Germany

<sup>4</sup> Compound Profiling and Screening, Helmholtz Centre for Infection Research GmbH, Inhoffenstrasse 7, 38124 Braunschweig, Germany

<sup>5</sup> Phytosolution, Querfurter Strasse 9, 06632 Freyburg, Germany

| Table of contents                                                                                                                                       | pages |
|---------------------------------------------------------------------------------------------------------------------------------------------------------|-------|
| NMR spectra of compounds <b>3–10</b> , <b>12–16</b> , <b>18</b> and HPLC chromatograms of compounds <b>3–10</b><br>(Figures S1-S67) .....               | S1-35 |
| Herbicidal effects on pot plants (Figure S68) .....                                                                                                     | S35   |
| Growth inhibitory effects of macrocidin derivatives on<br><i>E. coli</i> $\Delta$ TolC cultures (Figure S69) .....                                      | S36   |
| Growth inhibitory effects of macrocidin derivatives and established antibiotics on<br><i>Staphylococcus aureus</i> (SH1000) cultures (Figure S70) ..... | S36   |
| Growth inhibitory effects of selected macrocidin derivatives on<br><i>Acinetobacter baumannii</i> cultures (Figure S71) .....                           | S36   |
| Dispersal effects on preformed biofilms of <i>C. albicans</i> (Figure S72) .....                                                                        | S37   |
| Antibacterial effects of compounds <b>2–10</b> on <i>E. coli</i> $\Delta$ TolC and <i>S. aureus</i> (Table S1) .....                                    | S37   |
| <i>S. aureus</i> and <i>C. albicans</i> biofilm growth inhibition and dispersion data (Table S2) .....                                                  | S38   |
| IC <sub>50</sub> values for human cells (Table S3) .....                                                                                                | S39   |

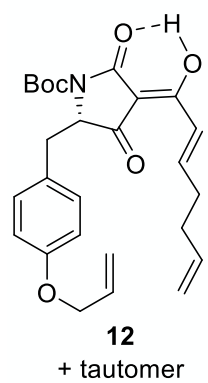

S1

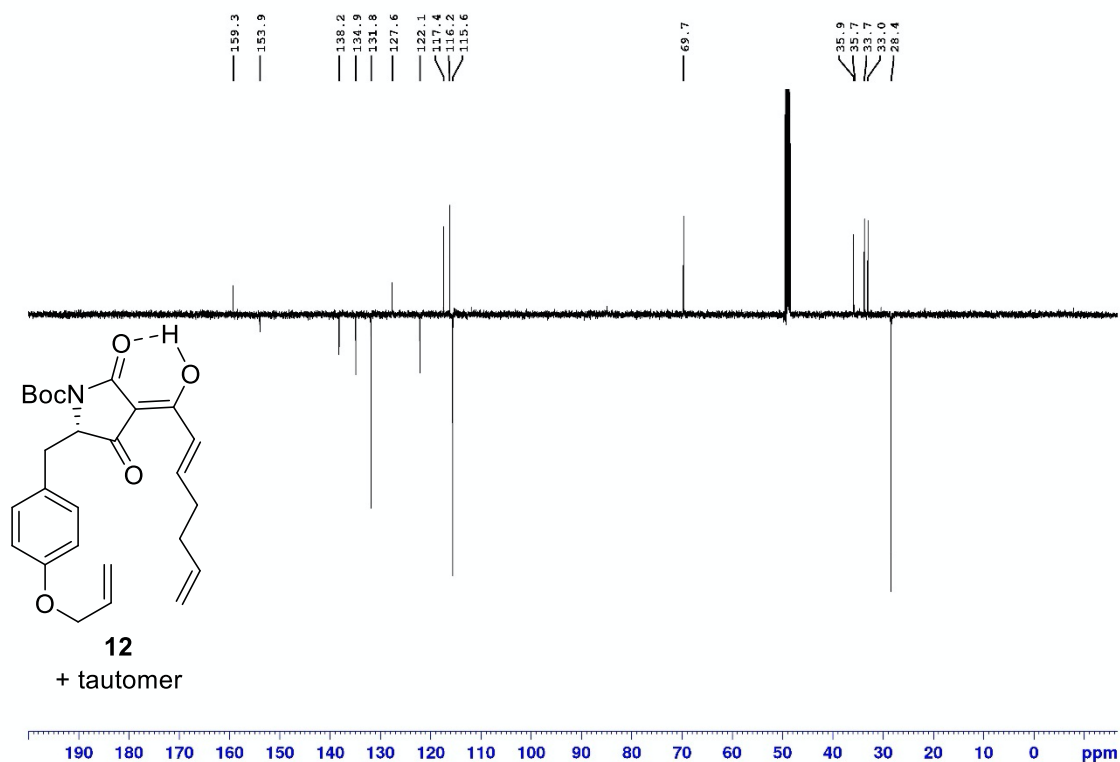

**Figure S2.**  $^{13}\text{C}$ -NMR spectrum of compound **12** in  $\text{CD}_3\text{OD}$ .

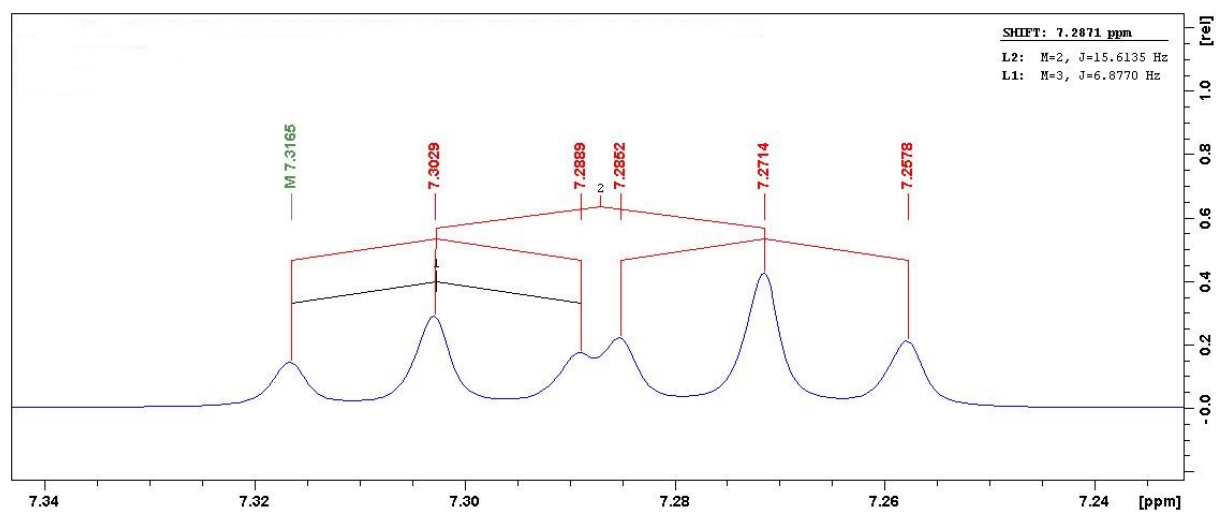

**Figure S3.** Part of  $^1\text{H}$ -NMR spectrum of compound **12** in  $\text{CD}_3\text{OD}$  with defined multiplet and coupling constants ( $J=15.6$ ,  $6.9$  Hz) that prove the (*E*)-configuration of the resulting double bond.

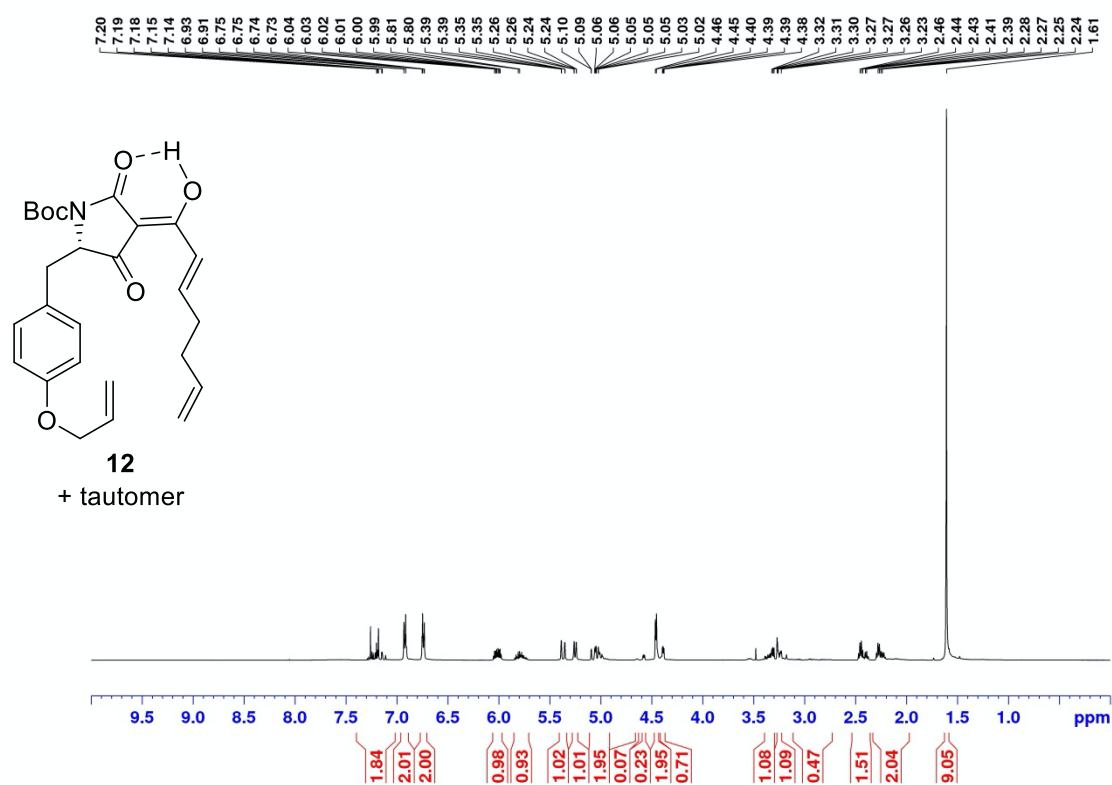

**Figure S4.**  $^1\text{H}$ -NMR spectrum of compound **12** in  $\text{CDCl}_3$ .

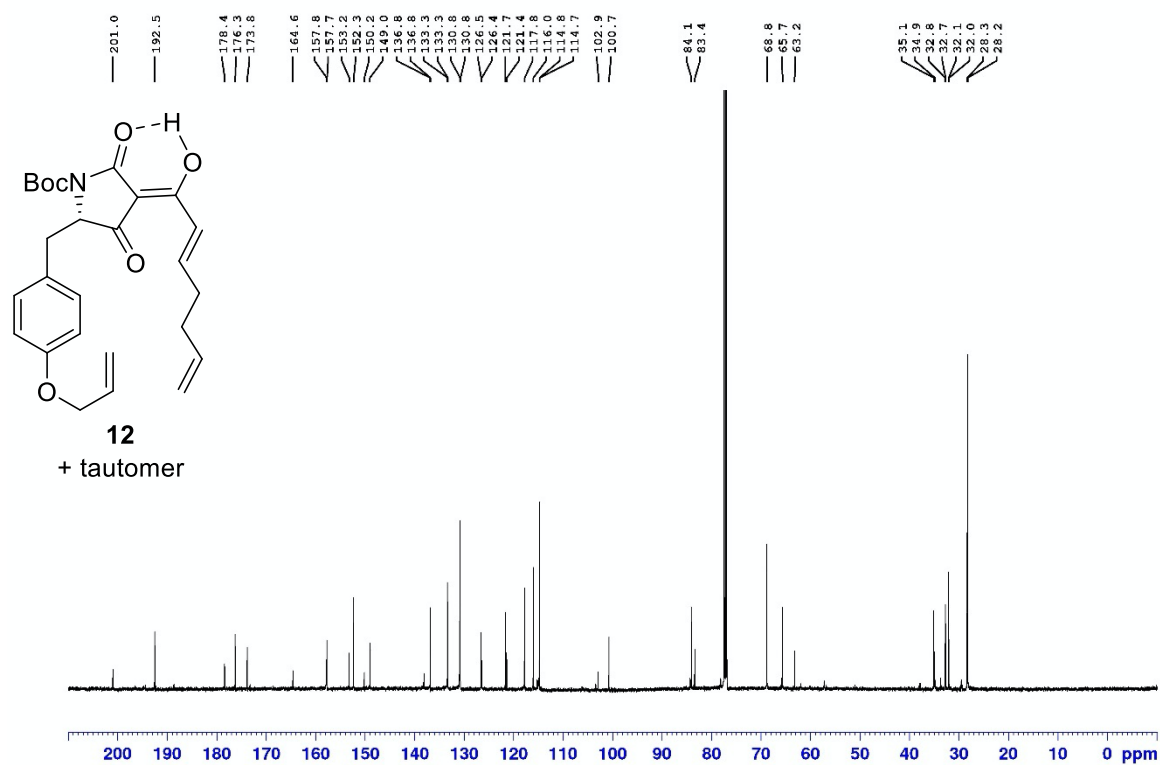

**Figure S5.**  $^{13}\text{C}$ -NMR spectrum of compound **12** in  $\text{CDCl}_3$ .



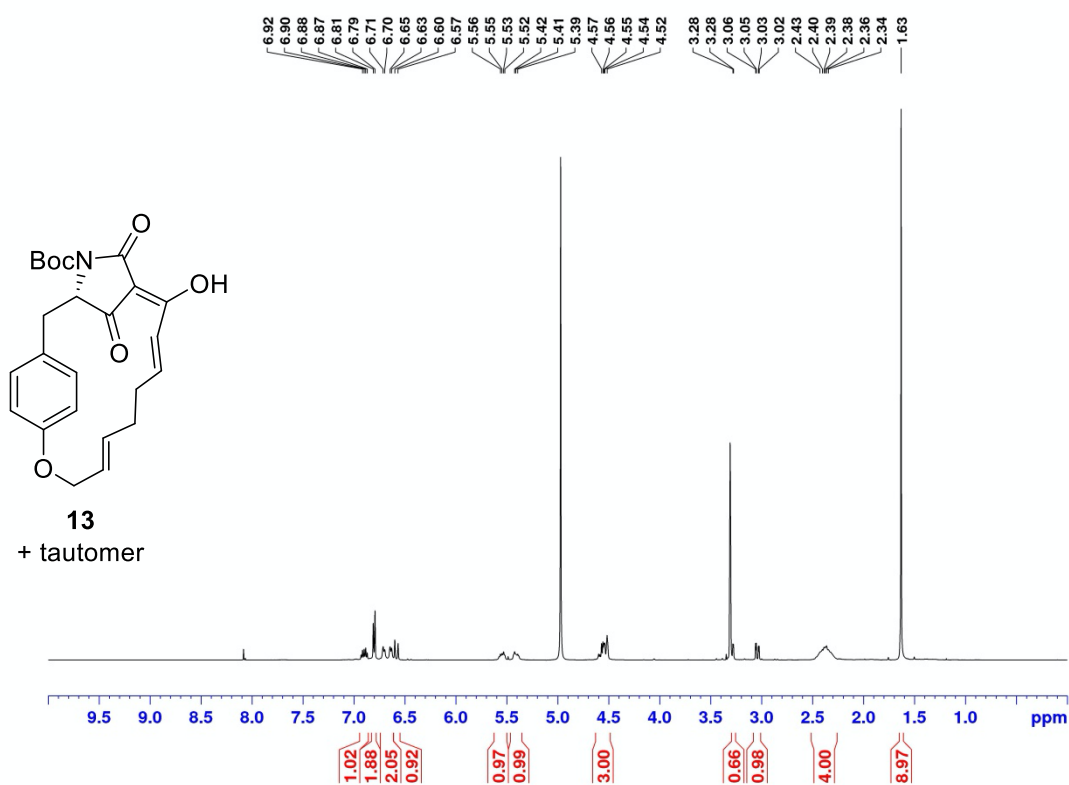

**Figure S6.**  $^1\text{H}$ -NMR spectrum of compound **13** in  $\text{CD}_3\text{OD}$ .

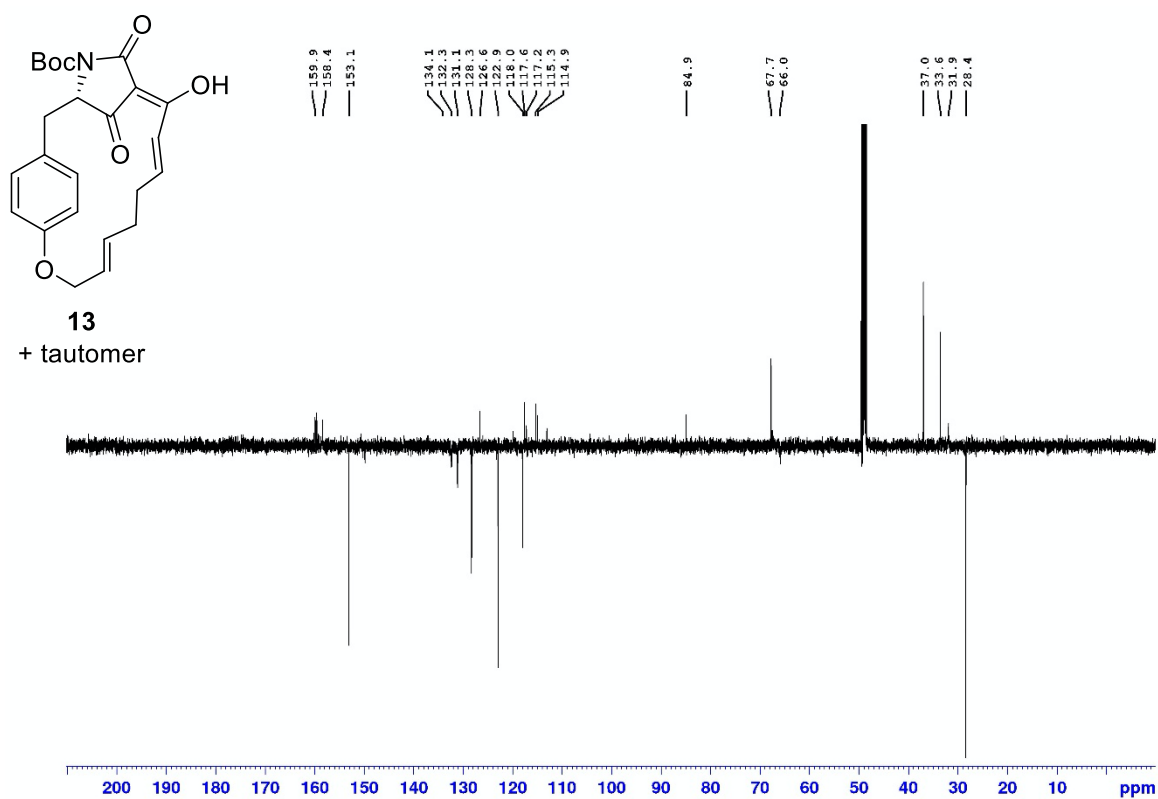

**Figure S7.**  $^{13}\text{C}$ -NMR spectrum of compound **13** in  $\text{CD}_3\text{OD}$ .

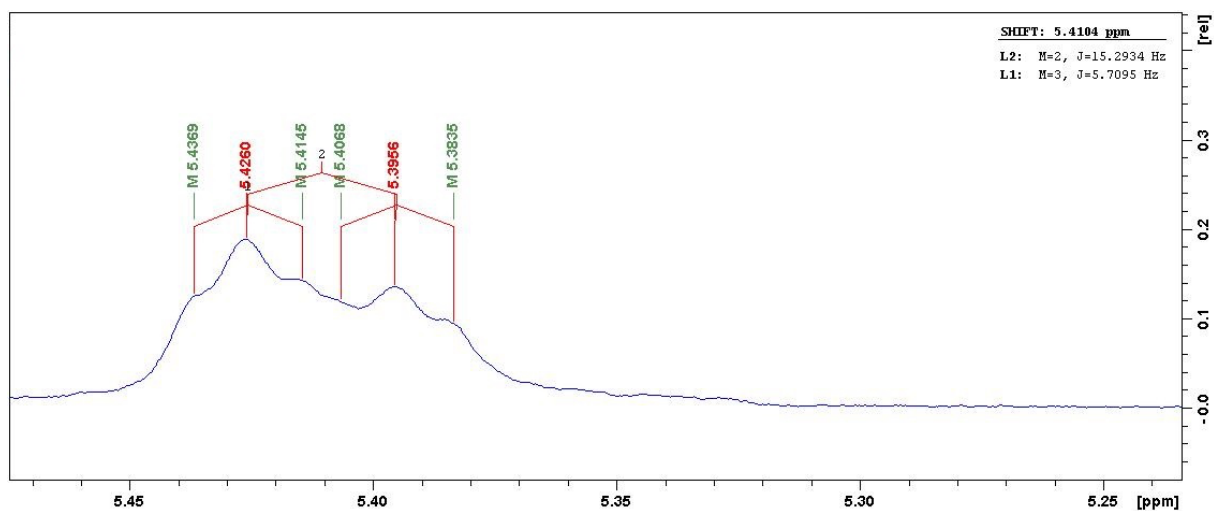

**Figure S8.** Part of  $^1\text{H}$ -NMR spectrum of compound **13** in  $\text{CD}_3\text{OD}$  with defined multiplet and coupling constants ( $J=15.3$ ,  $5.7$  Hz) that prove the (*E*)-configuration of the resulting isolated double bond.

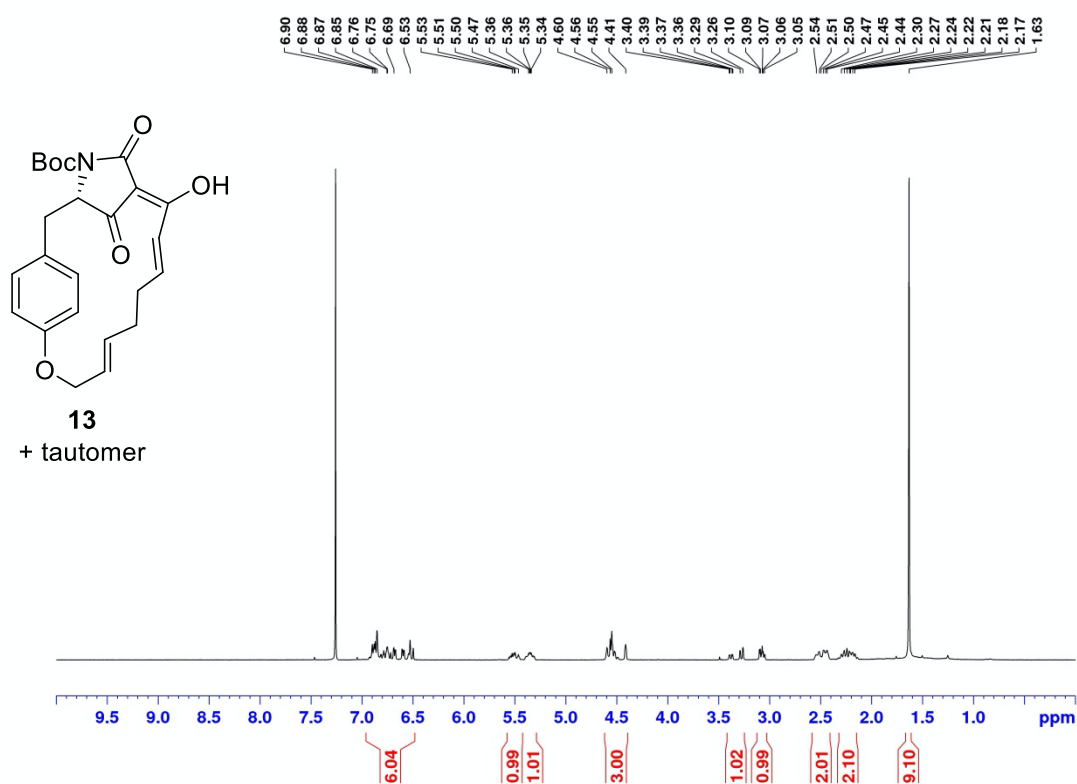

**Figure S9.**  $^1\text{H}$ -NMR spectrum of compound **13** in  $\text{CDCl}_3$ .

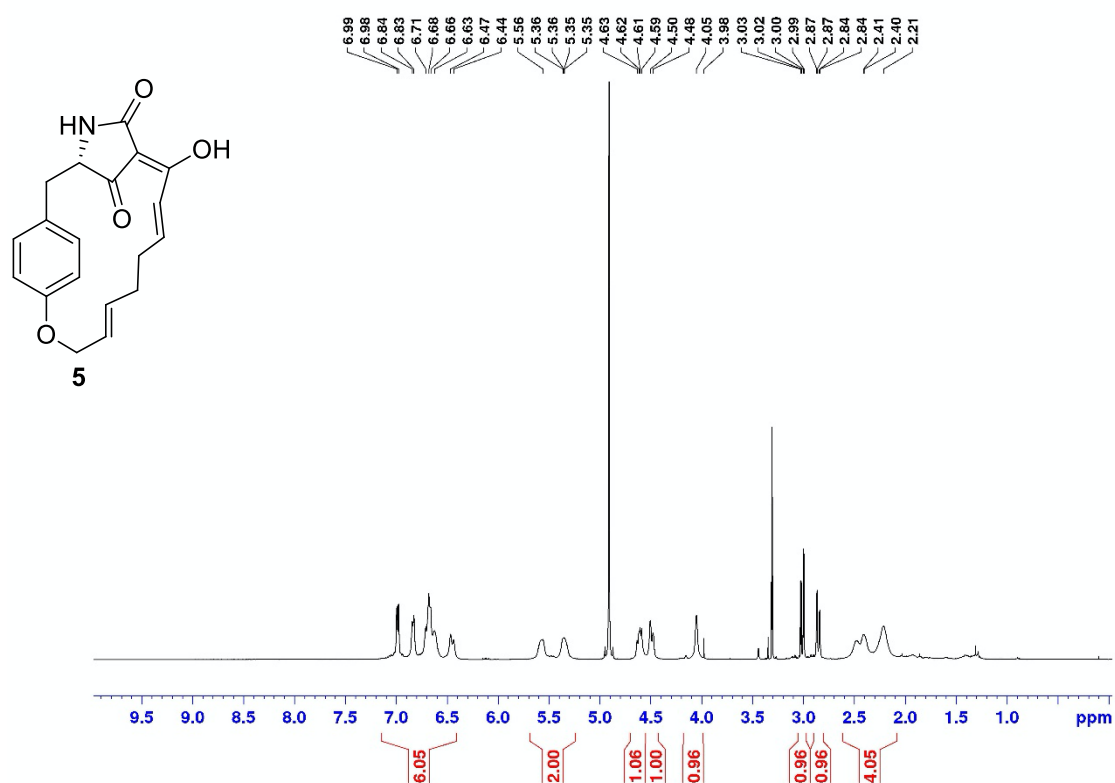

**Figure S10.**  $^1\text{H}$ -NMR spectrum of compound **5** in CD $_3$ OD.

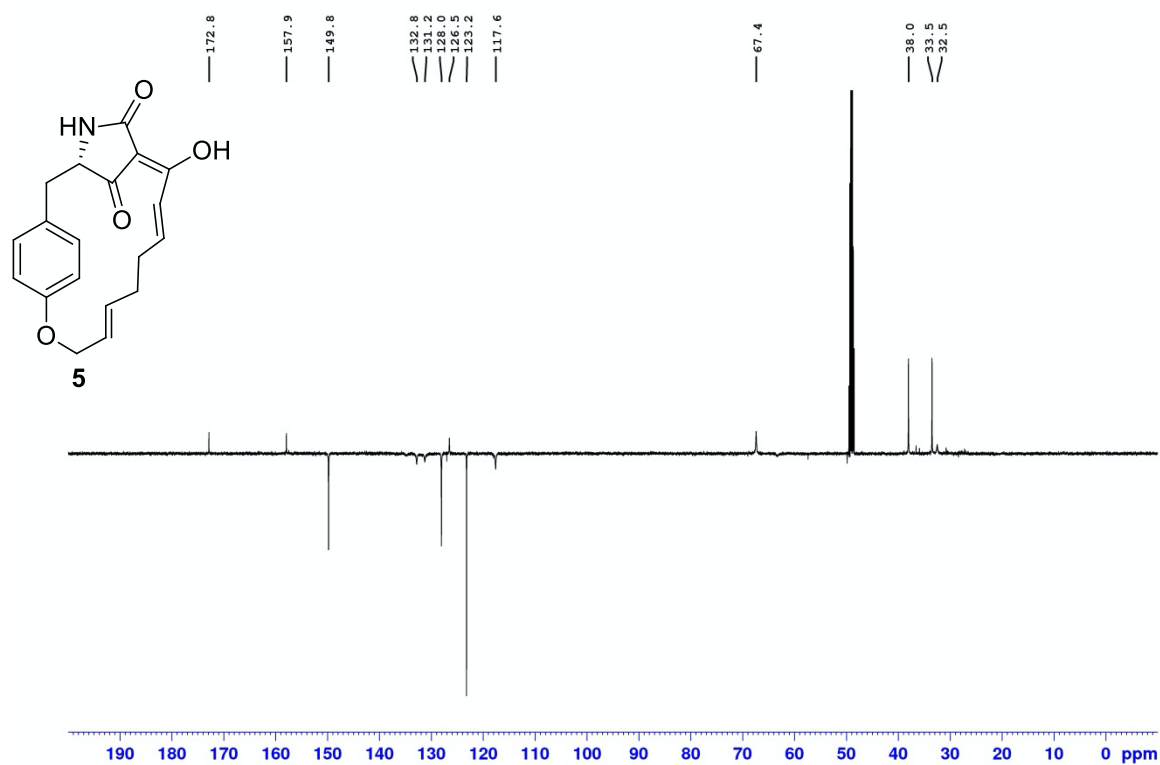

**Figure S11.**  $^{13}\text{C}$ -NMR spectrum of compound **5** in CD $_3$ OD.

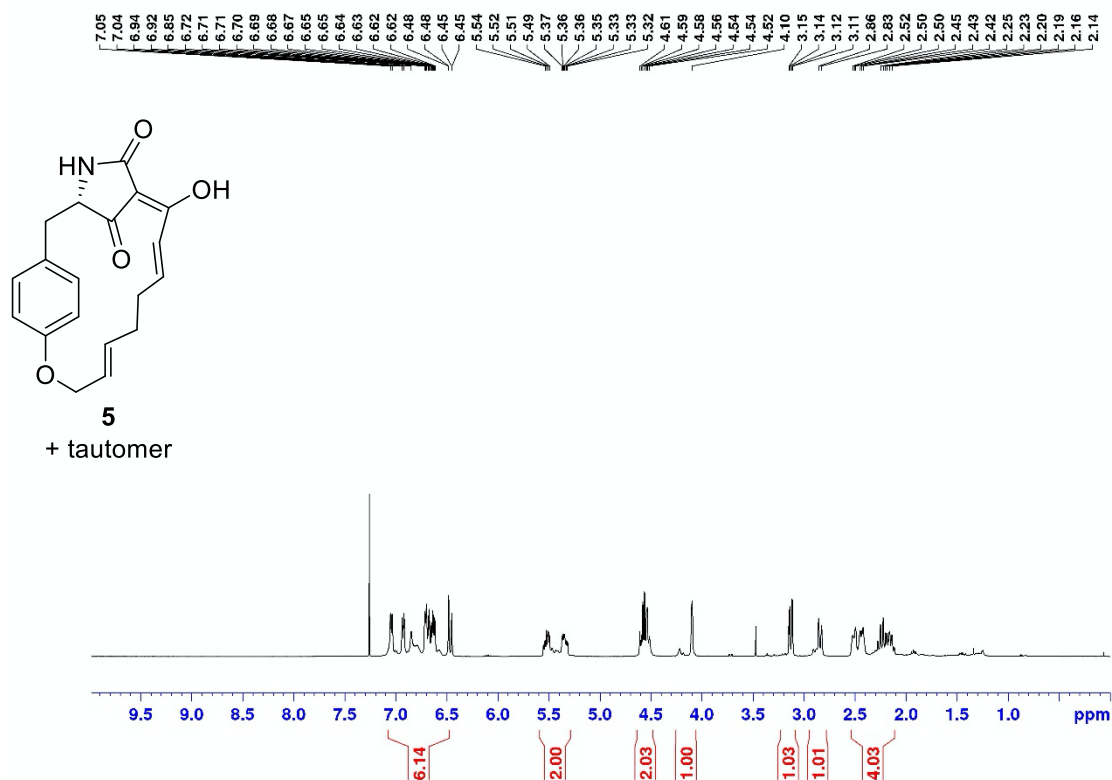

**Figure S12.** <sup>1</sup>H-NMR spectrum of compound **5** in CDCl<sub>3</sub>.

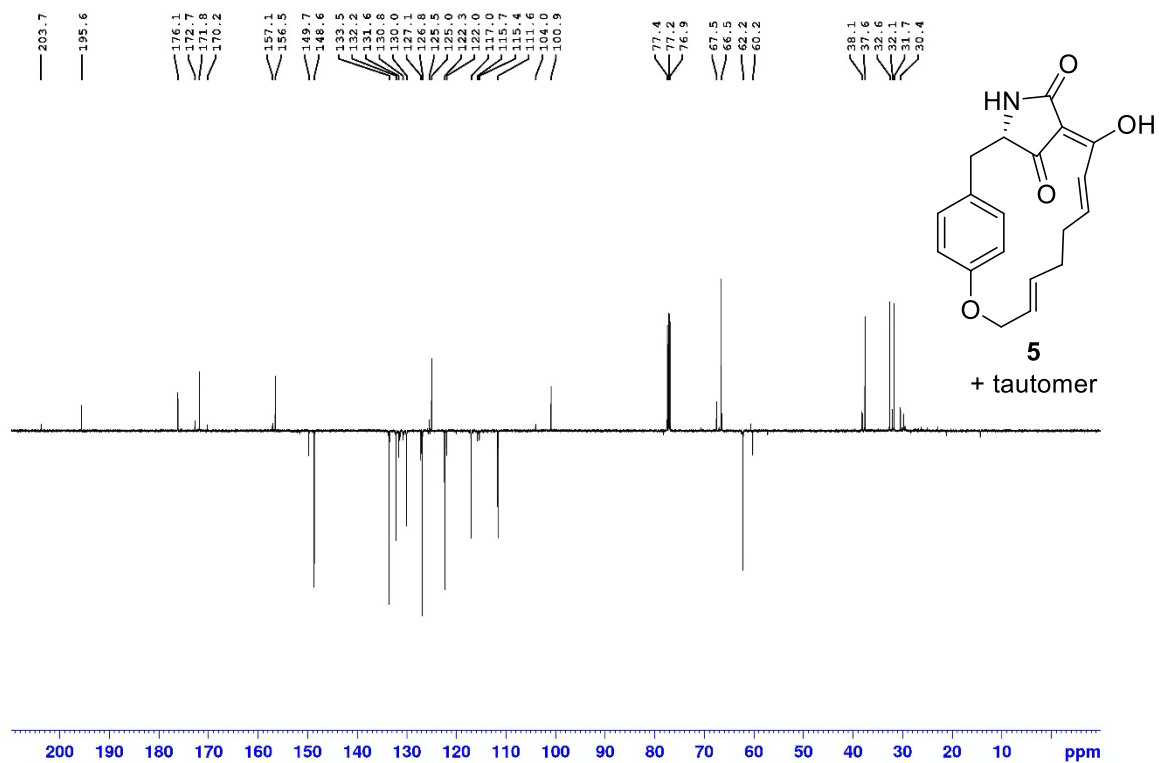

**Figure S13.** <sup>13</sup>C-NMR spectrum of compound **5** in CDCl<sub>3</sub>.



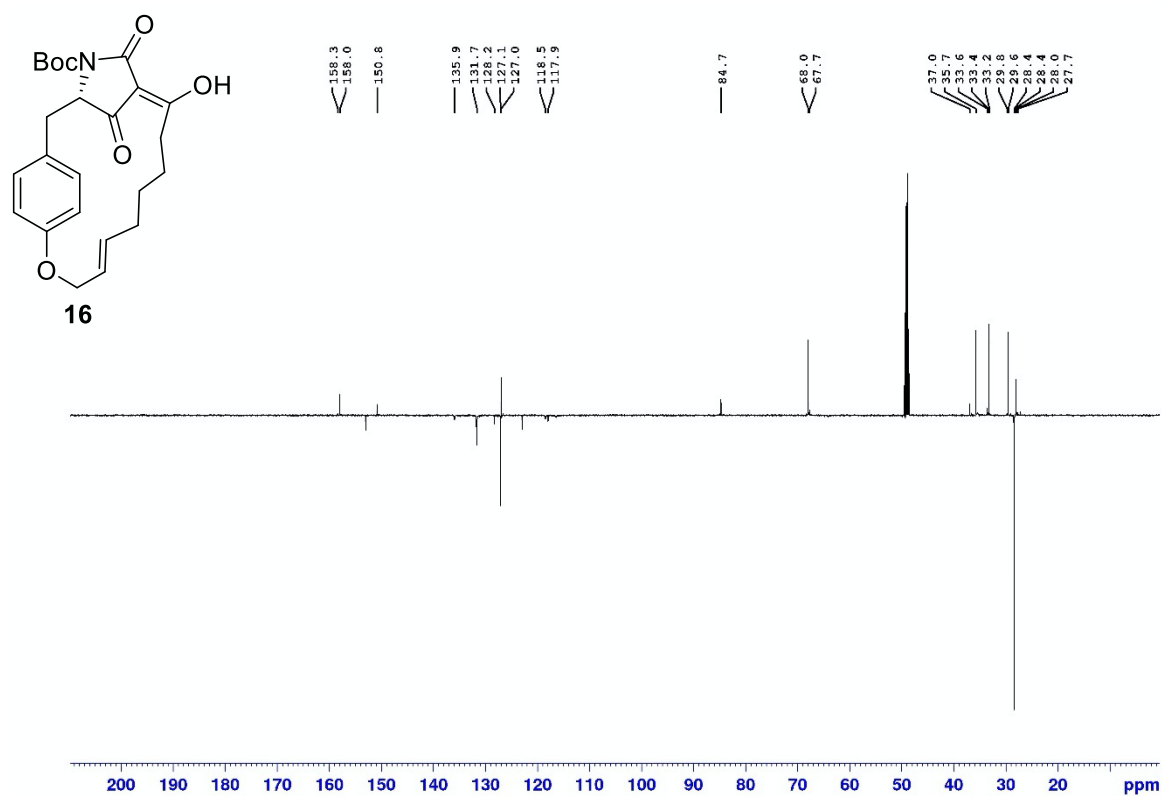

**Figure S16.**  $^{13}\text{C}$ -NMR spectrum of compound **16** in  $\text{CD}_3\text{OD}$ .

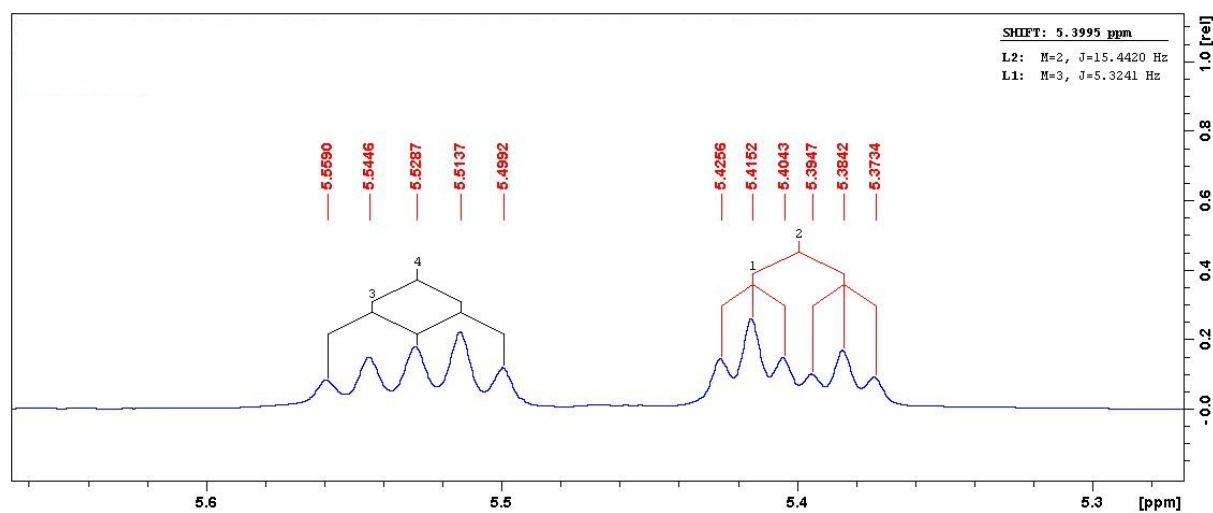

**Figure S17.** Part of  $^1\text{H}$ -NMR spectrum of compound **16** in  $\text{CD}_3\text{OD}$  with defined multiplet and coupling constants ( $J=15.4$ ,  $5.3$  Hz) that prove the (*E*)-configuration of double bond.

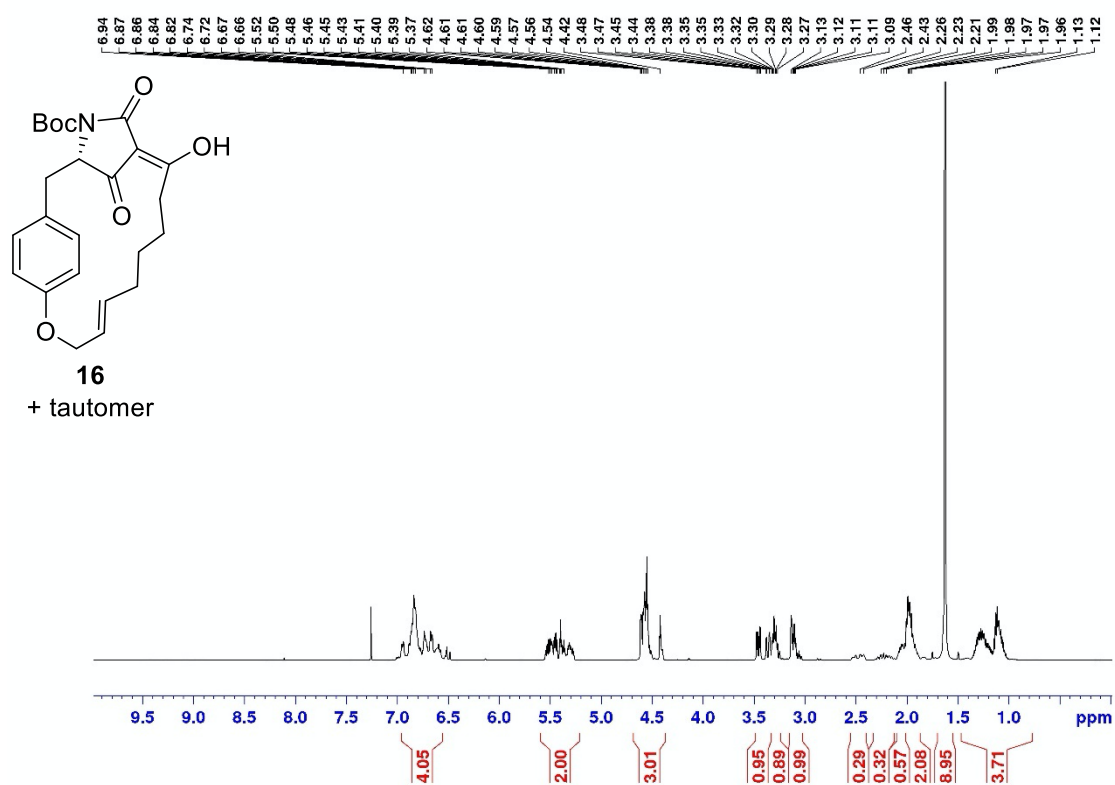

Figure S18. <sup>1</sup>H-NMR spectrum of compound **16** in CDCl<sub>3</sub>.

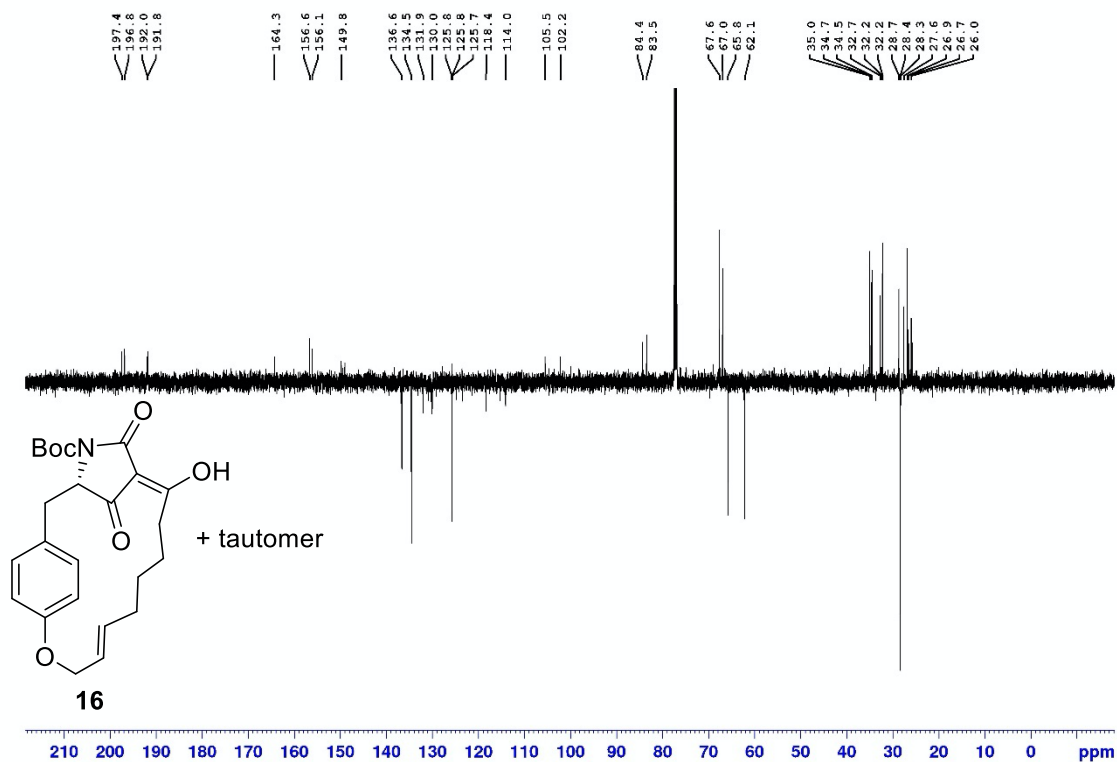

Figure S19. <sup>13</sup>C-NMR spectrum of compound **16** in CDCl<sub>3</sub>.

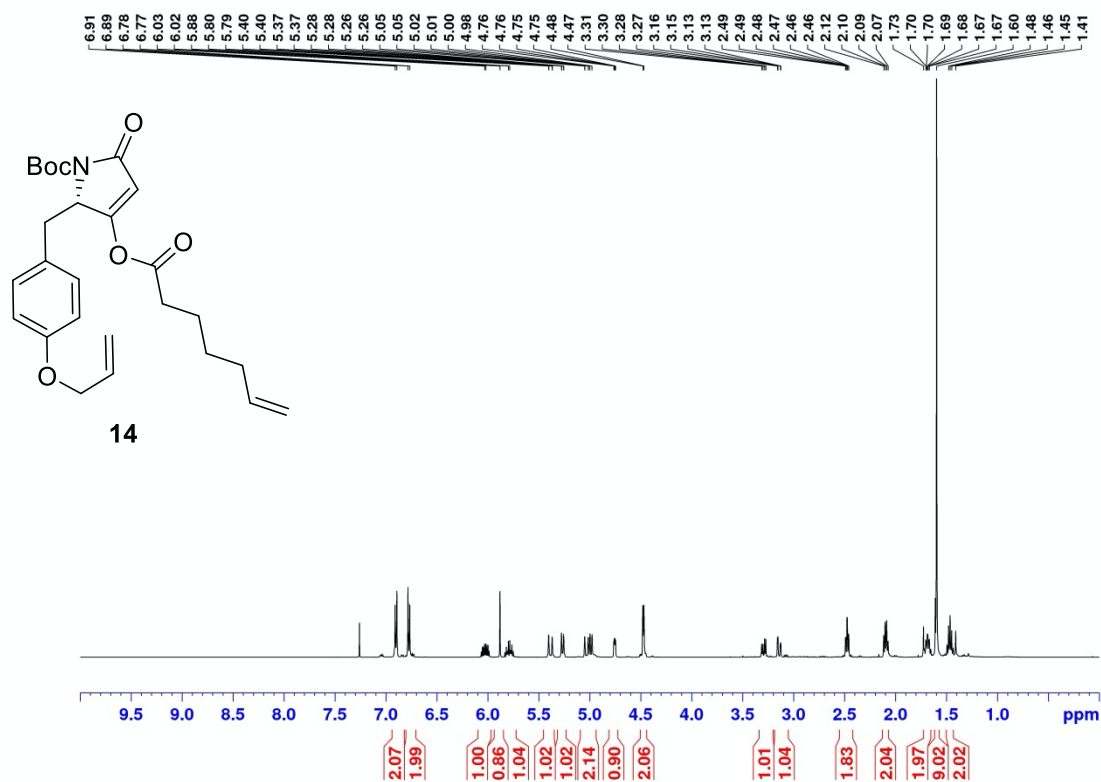

Figure S20. <sup>1</sup>H-NMR spectrum of compound **14** in CDCl<sub>3</sub>.

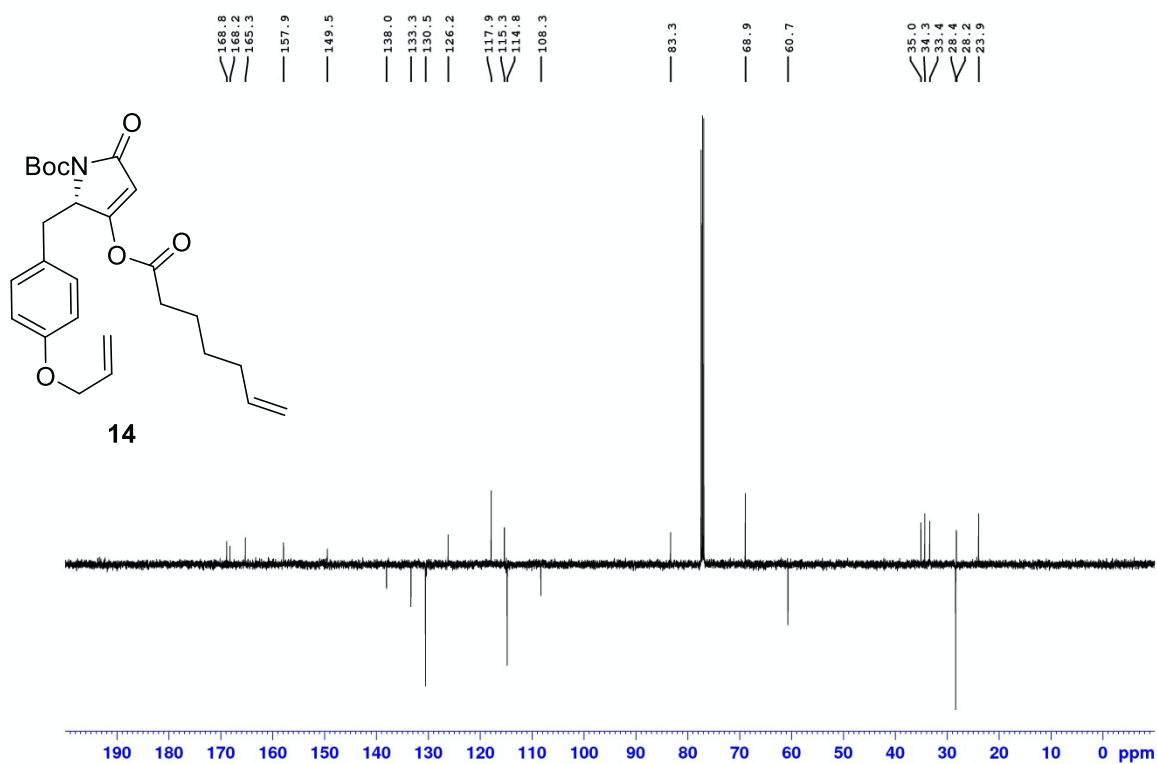

Figure S21. <sup>13</sup>C-NMR spectrum of compound **14** in CDCl<sub>3</sub>.



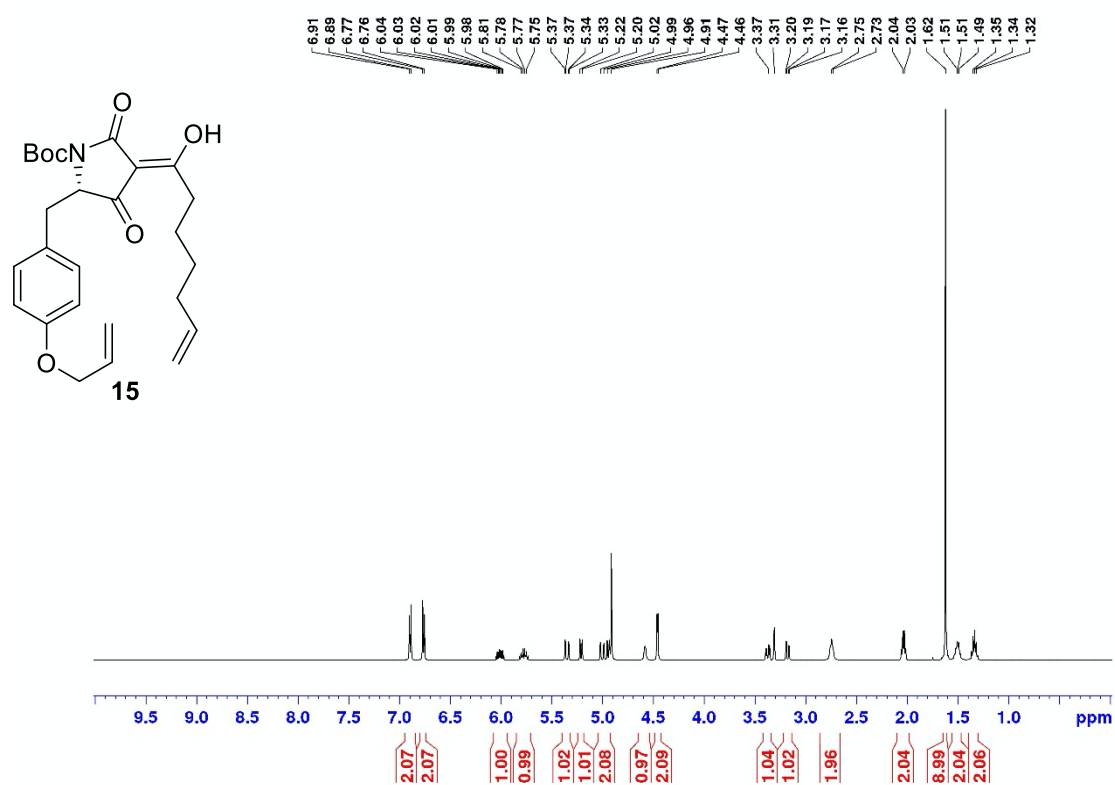

**Figure S22.**  $^1\text{H}$ -NMR spectrum of compound **15** in CD $_3$ OD.

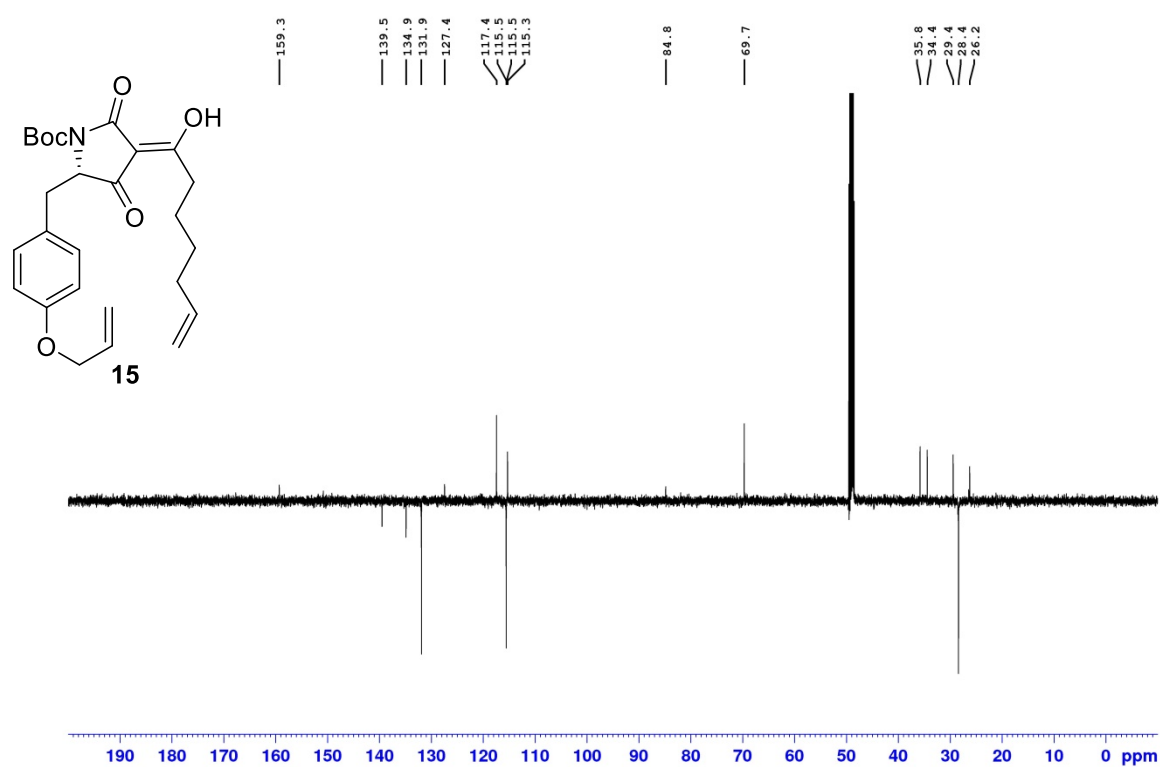

**Figure S23.**  $^{13}\text{C}$ -NMR spectrum of compound **15** in CD $_3$ OD.

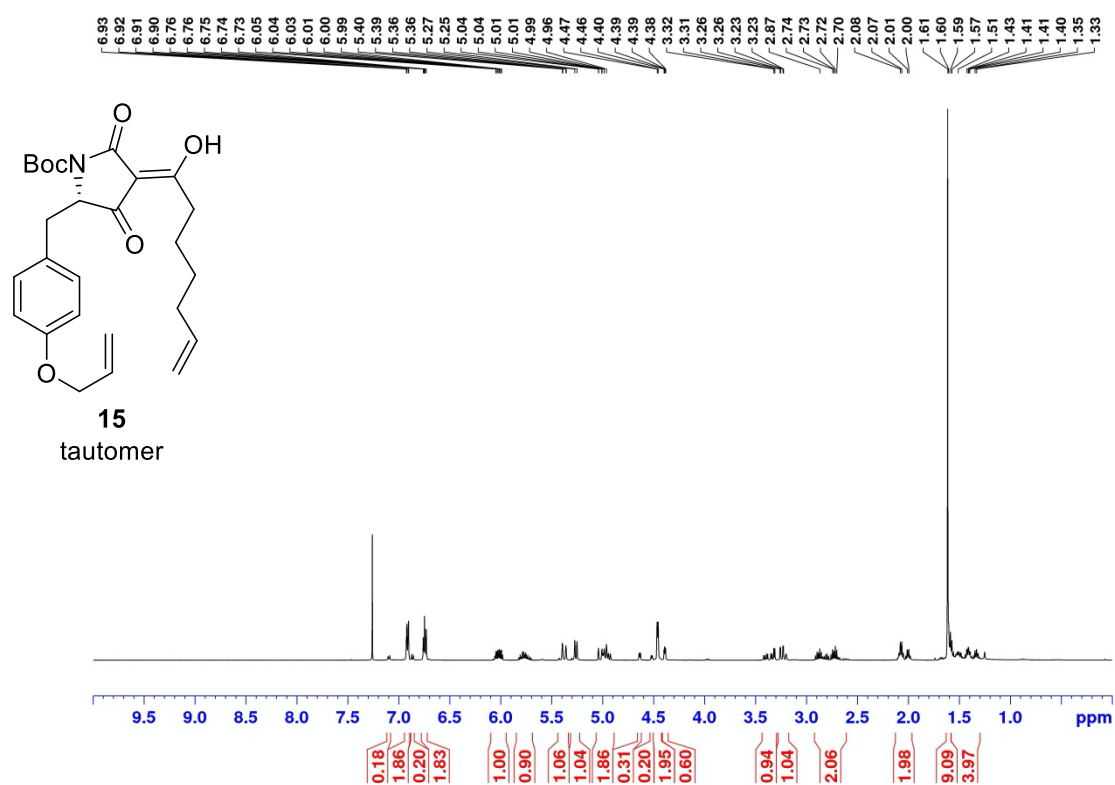

Figure S24. <sup>1</sup>H-NMR spectrum of compound **15** in CDCl<sub>3</sub>.

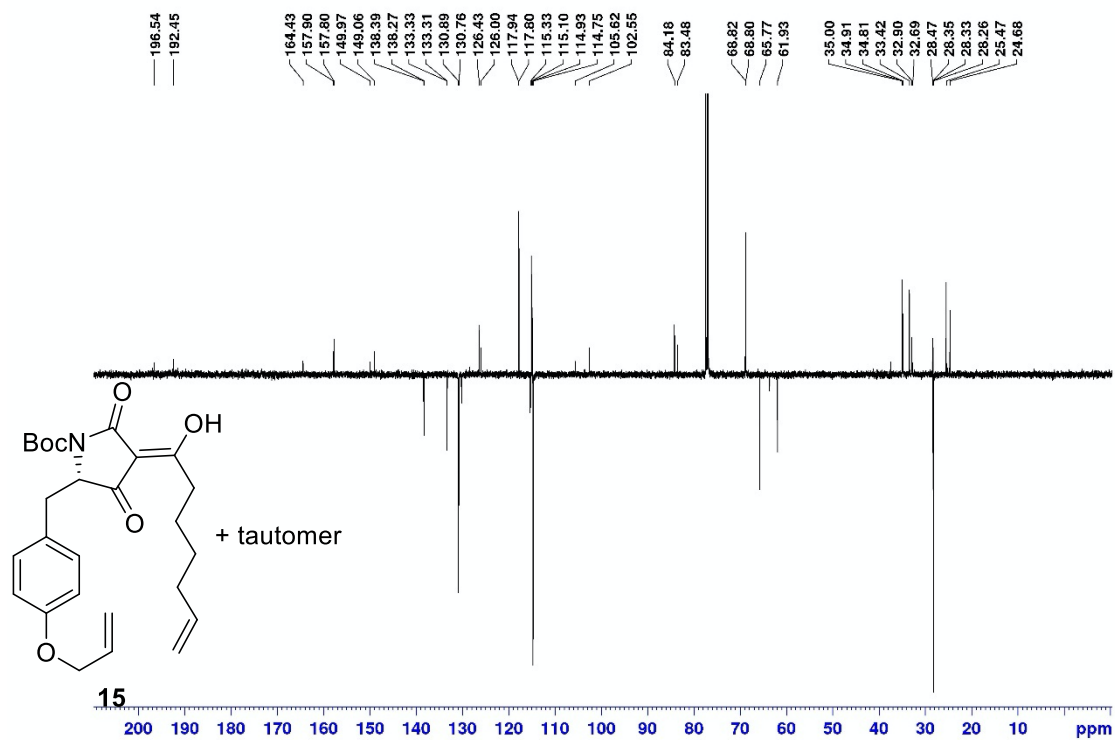

Figure S25. <sup>13</sup>C-NMR spectrum of compound **15** in CDCl<sub>3</sub>.

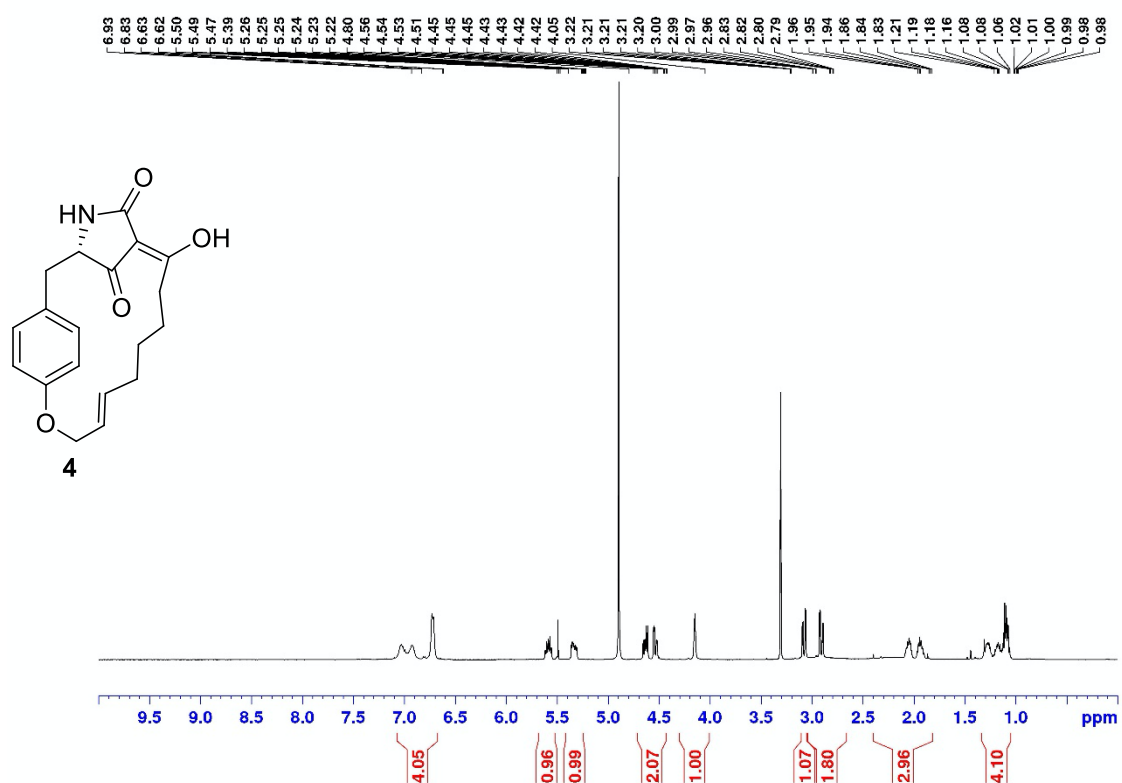

**Figure S26.** <sup>1</sup>H-NMR spectrum of compound **4** in CD<sub>3</sub>OD.

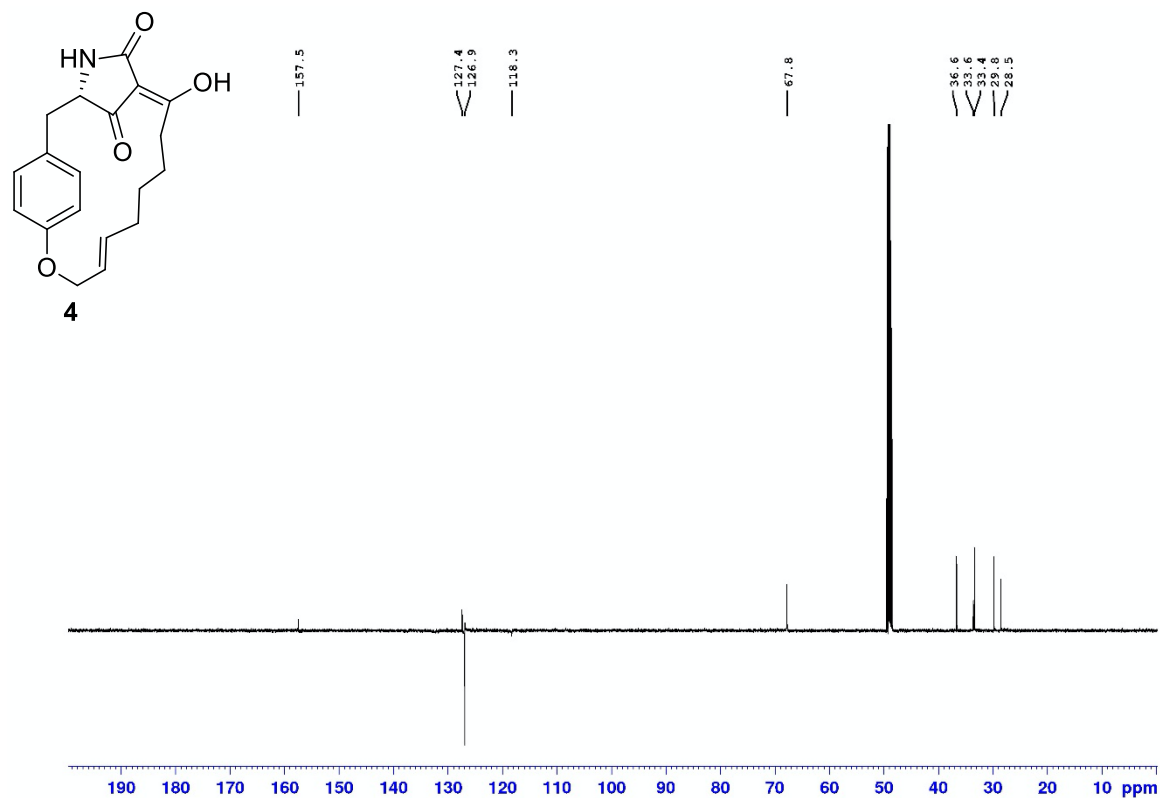

**Figure S27.** <sup>13</sup>C-NMR spectrum of compound **4** in CD<sub>3</sub>OD.

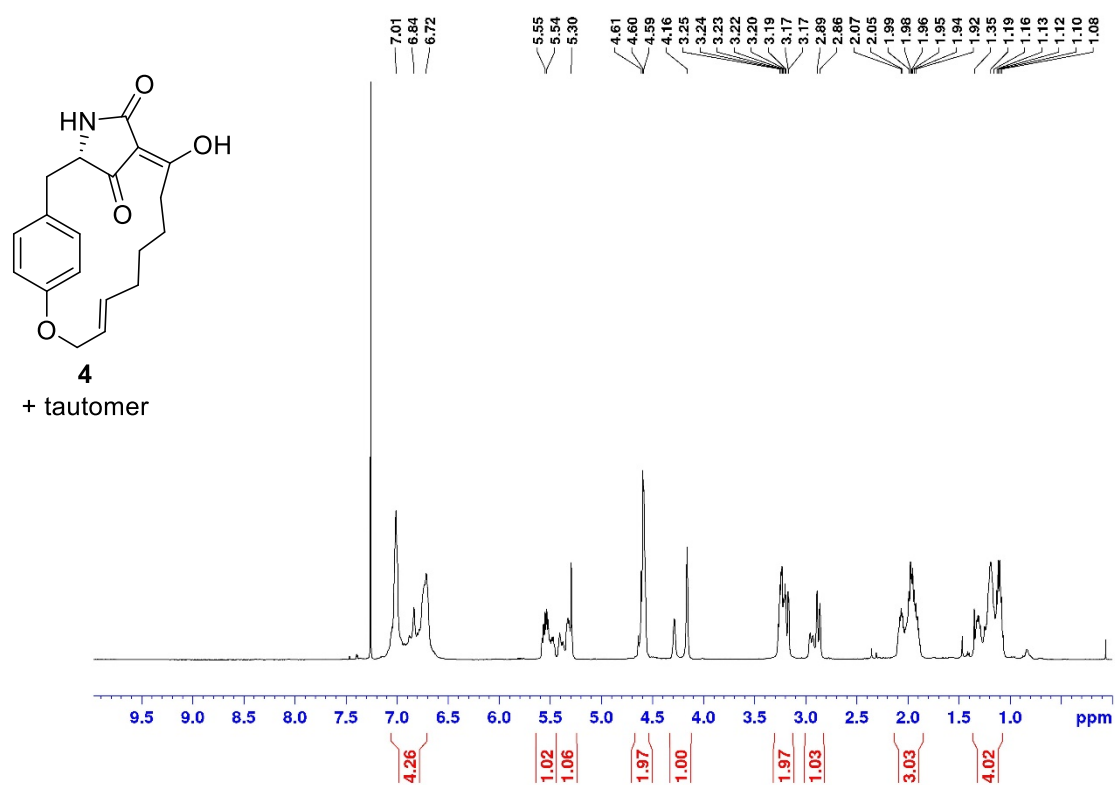

Figure S28. <sup>1</sup>H-NMR spectrum of compound **4** in CDCl<sub>3</sub>.

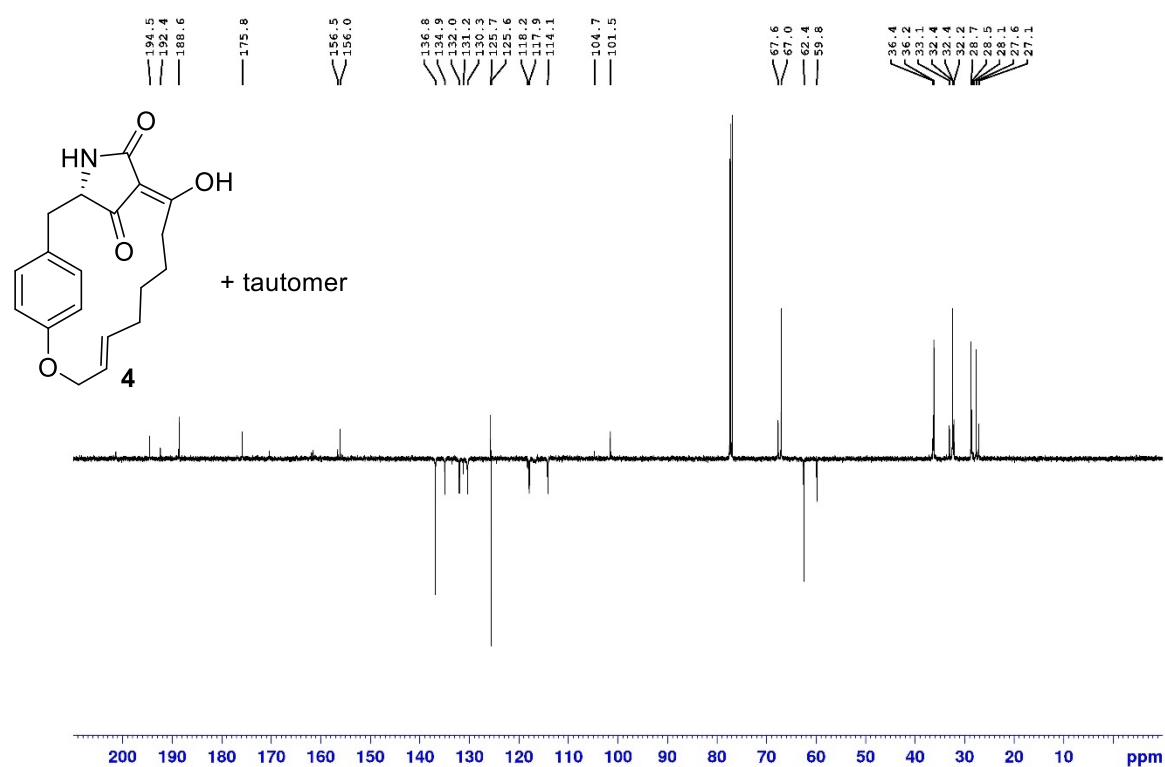

Figure S29. <sup>13</sup>C-NMR spectrum of compound **4** in CDCl<sub>3</sub>.

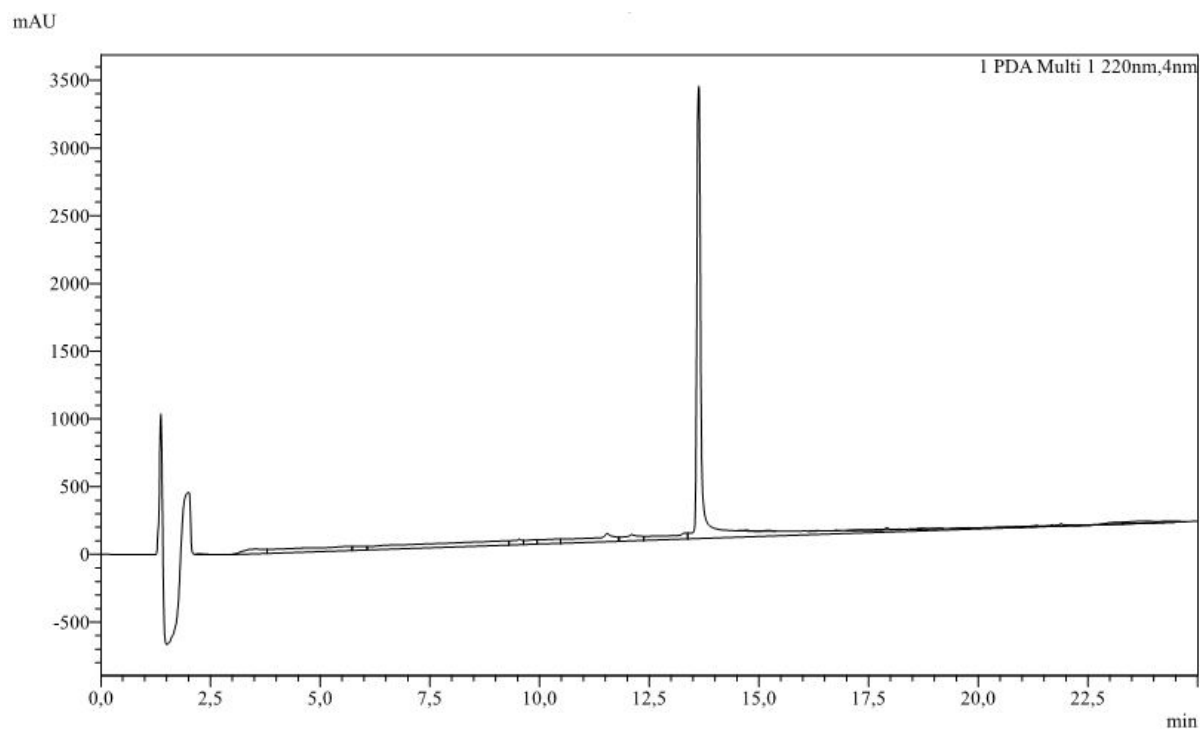

**Figure S30.** Chromatogram of compound **4**. HPLC: *Shimadzu Nexera XR*, Autosampler *SIL-20A*, diode array detector *SPD-M20A*, C18-column (150 × 4 mm). Method: 10% MeCN in H<sub>2</sub>O + 0.1% HCOOH → 97% MeCN in H<sub>2</sub>O + 0.1% HCOOH, flow: 1.0 mL/min.

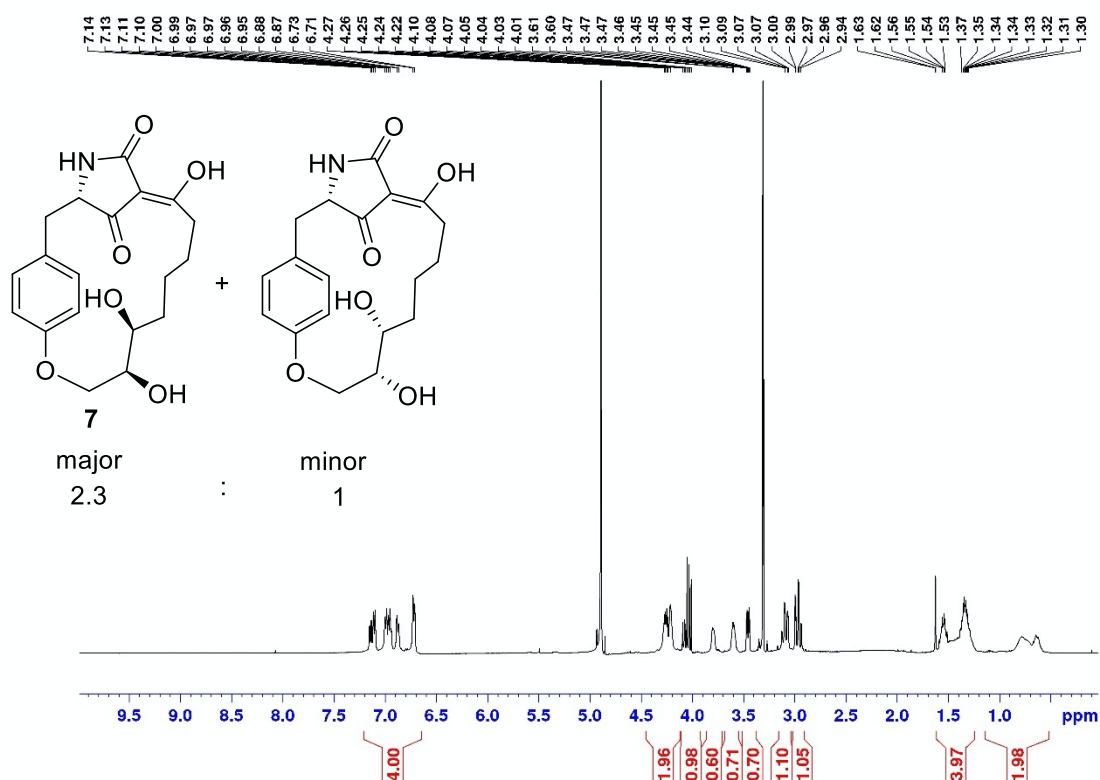

**Figure S31.** <sup>1</sup>H-NMR spectrum of compound **7** in CD<sub>3</sub>OD.

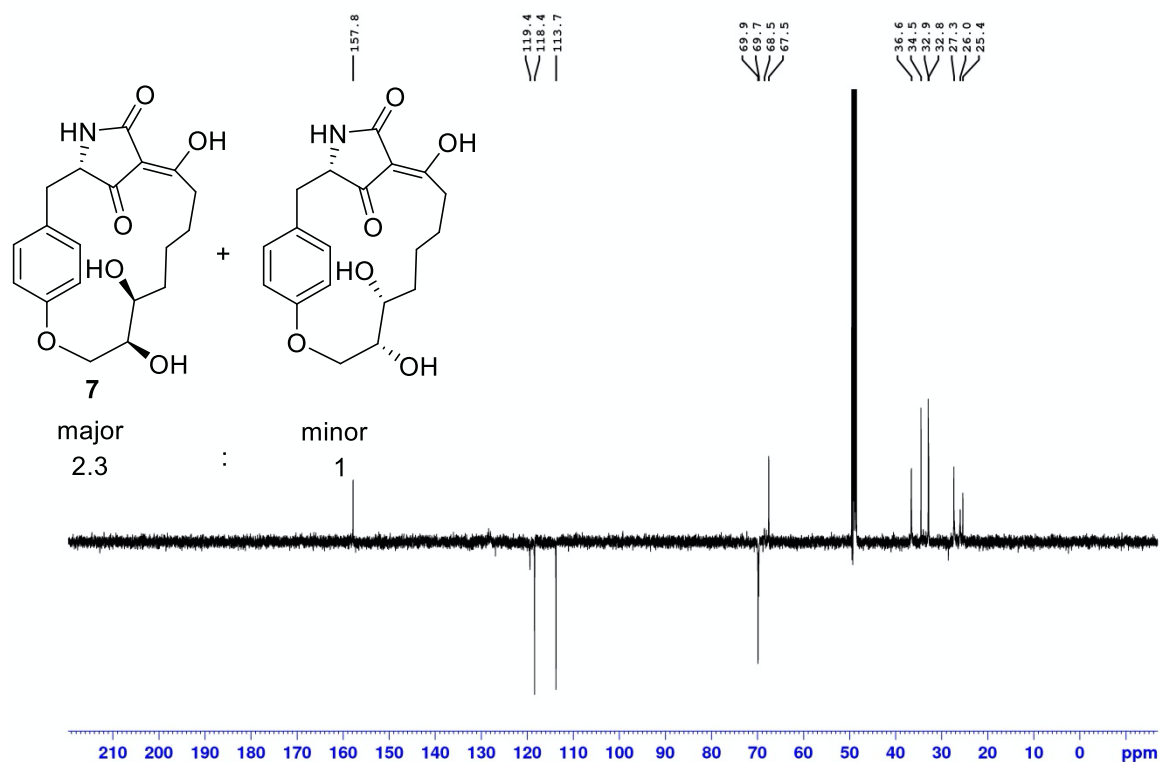

**Figure S32.**  $^{13}\text{C}$ -NMR spectrum of compound 7 in  $\text{CD}_3\text{OD}$ .

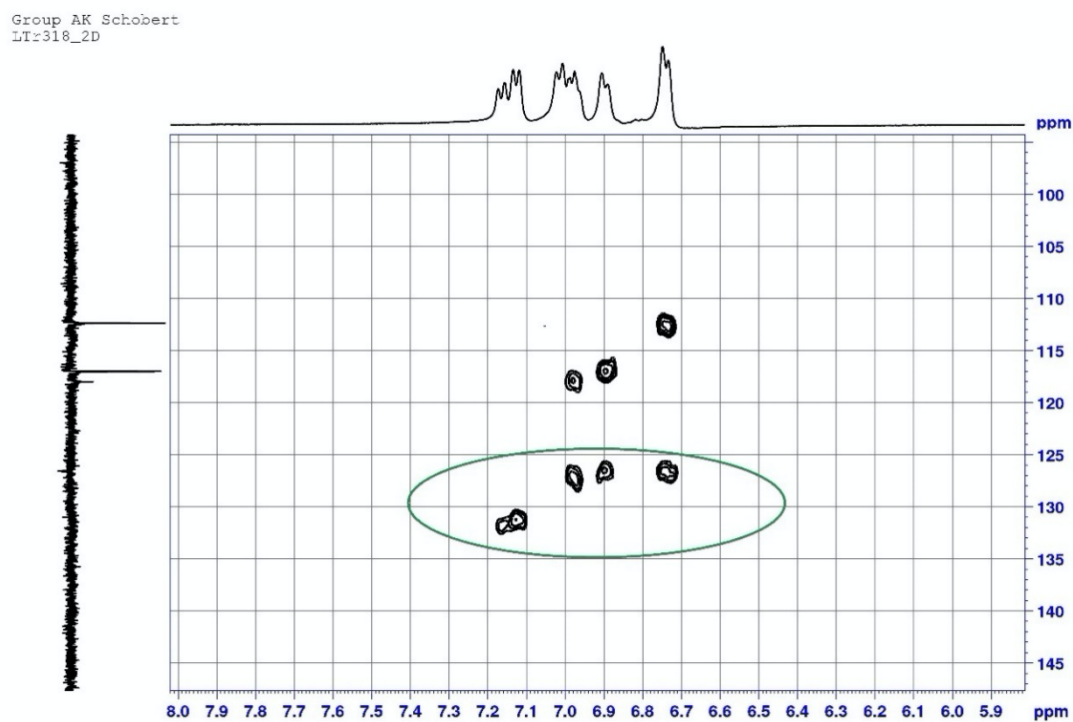

**Figure S33.** Part of HMBC-2D-NMR spectrum of compound 7 in  $\text{CD}_3\text{OD}$ , which was used for peak assignment.

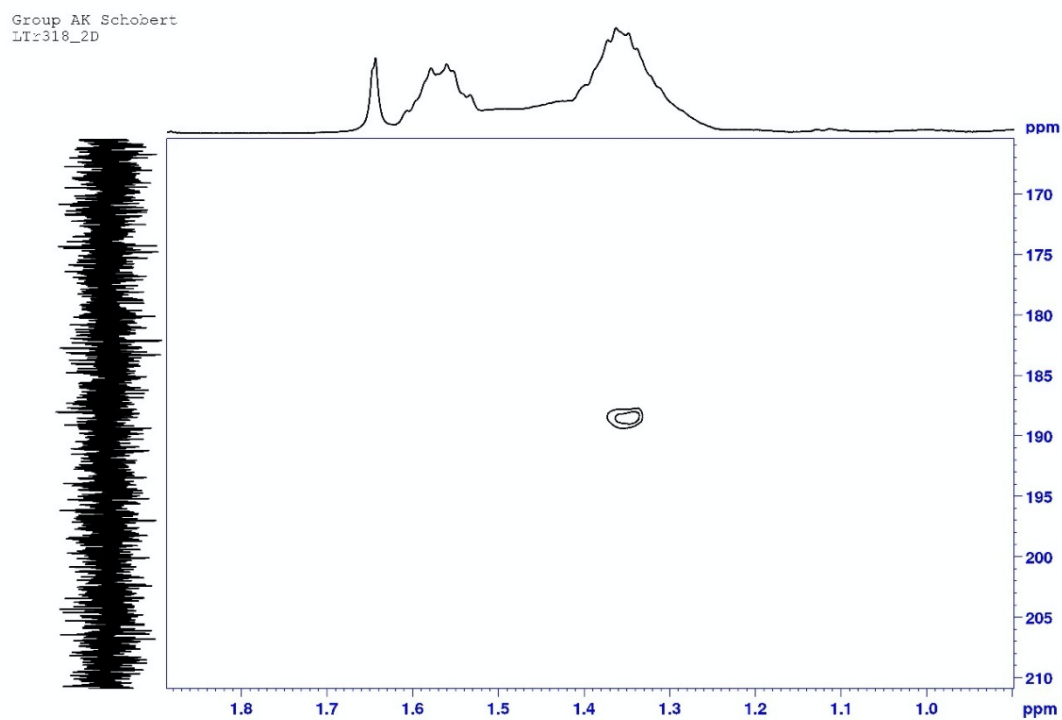

**Figure S34.** Part of HMBC-2D-NMR spectrum of compound **7** in CD<sub>3</sub>OD, which was used for peak assignment.

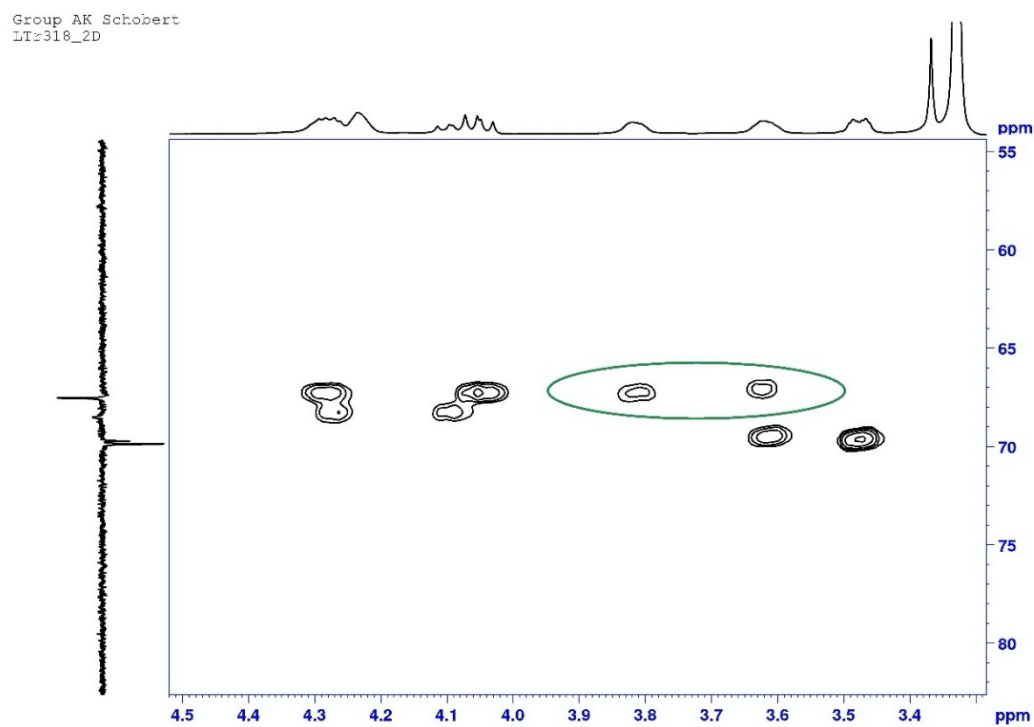

**Figure S35.** Part of HSQC-2D-NMR spectrum of compound **7** in CD<sub>3</sub>OD, which was used for peak assignment.

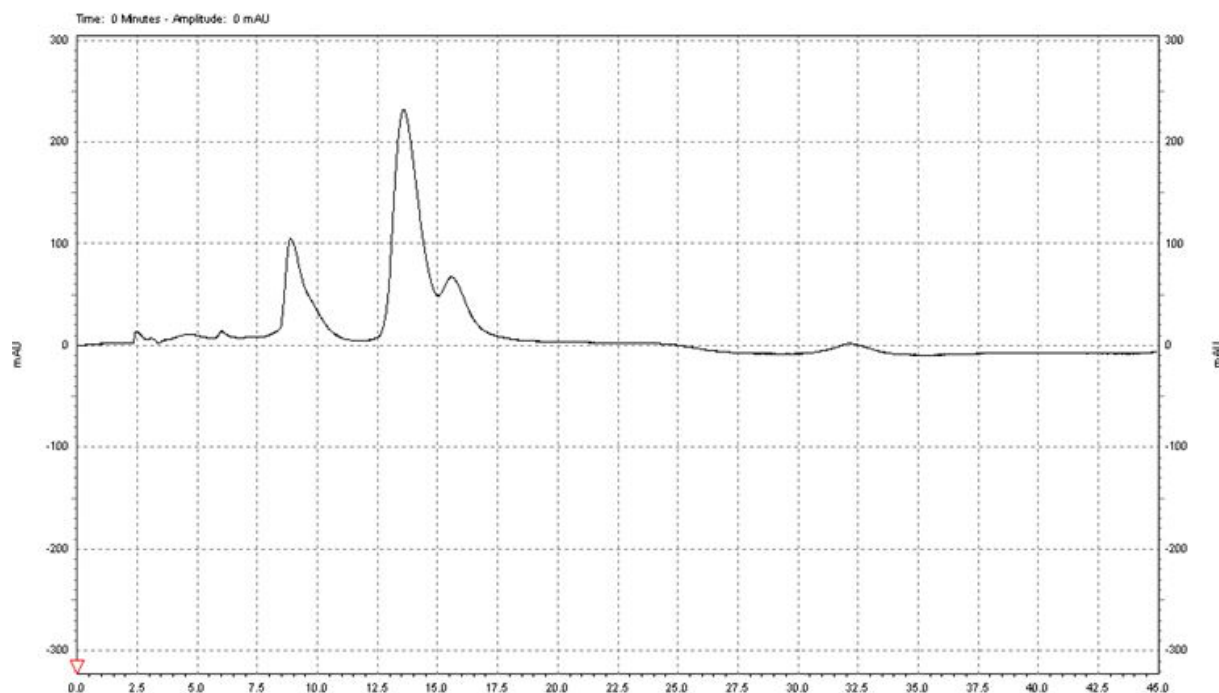

**Figure S36.** Chromatogram of compound **7**. HPLC: Beckmann System Gold Programmable Solvent Modul 126, Beckmann instruments diode array detection module 128, Phenomenex Lux® Amylose-1-HPLC column (100 × 4.6 mm). Method: 30% EtOH in hexanes → 40% EtOH in hexanes → 50% EtOH in hexanes → 60% EtOH in hexanes → 80% EtOH in hexanes, flow: 0.7 mL/min. A mixture of tautomers and diastereomers can be seen

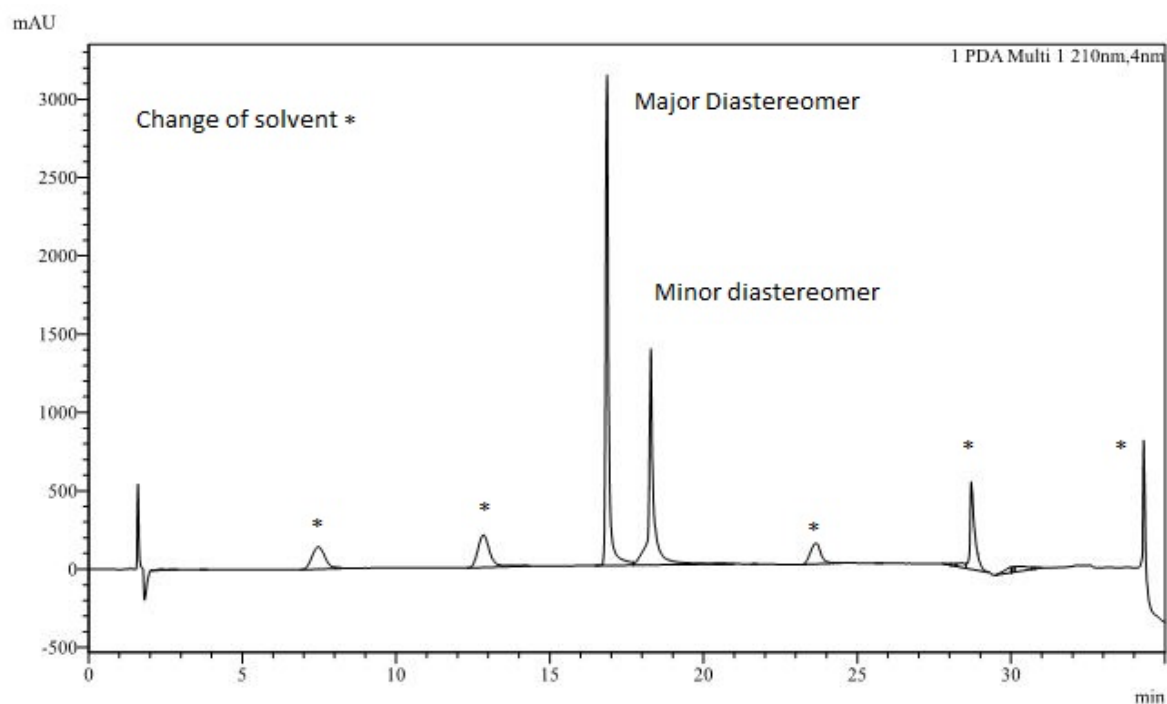

**Figure S37.** Chromatogram of compound **7**. HPLC: Shimadzu Nexera XR, Autosampler SIL-20A, diode array detector SPD-M20A, C18-column (150 × 4 mm). Method: 5% MeCN in H<sub>2</sub>O + 0.1% HCOOH → 10% MeCN in H<sub>2</sub>O + 0.1% HCOOH → 20% MeCN in H<sub>2</sub>O + 0.1% HCOOH → 30% MeCN in H<sub>2</sub>O + 0.1% HCOOH → 40% MeCN in H<sub>2</sub>O + 0.1% HCOOH → 97% MeCN in H<sub>2</sub>O + 0.1% HCOOH, flow: 1.0 mL/min.



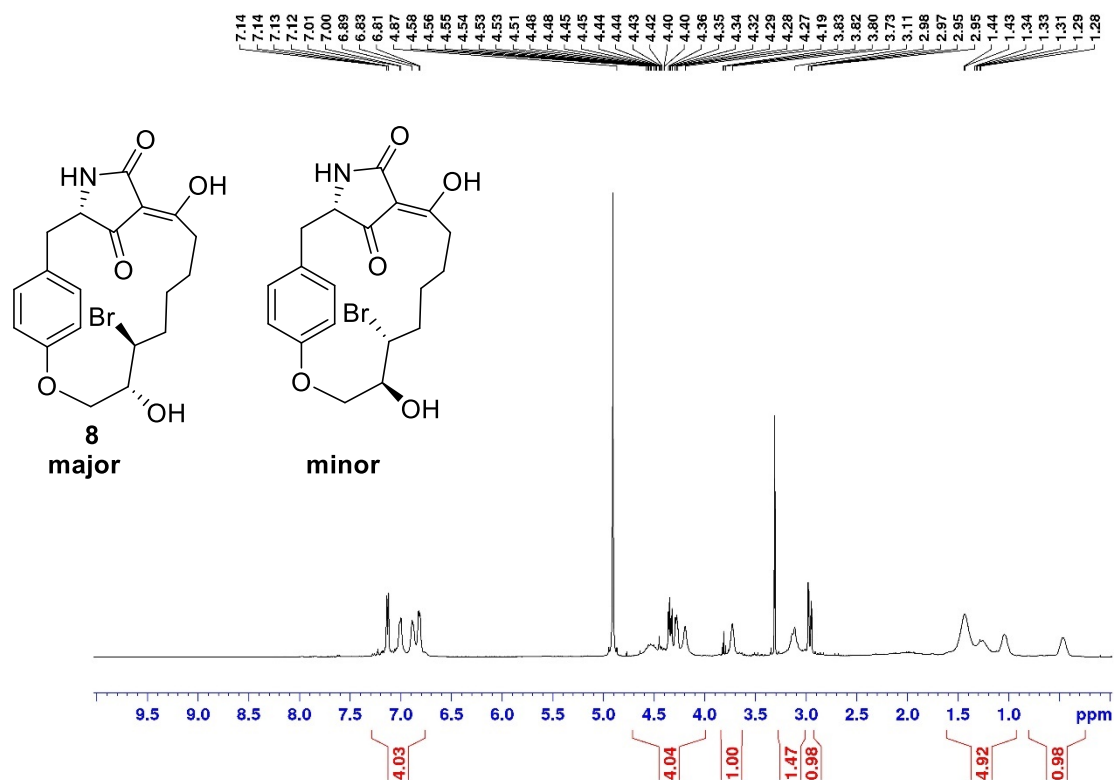

Figure S38.  $^1\text{H}$ -NMR spectrum of compound **8** in  $\text{CD}_3\text{OD}$ .

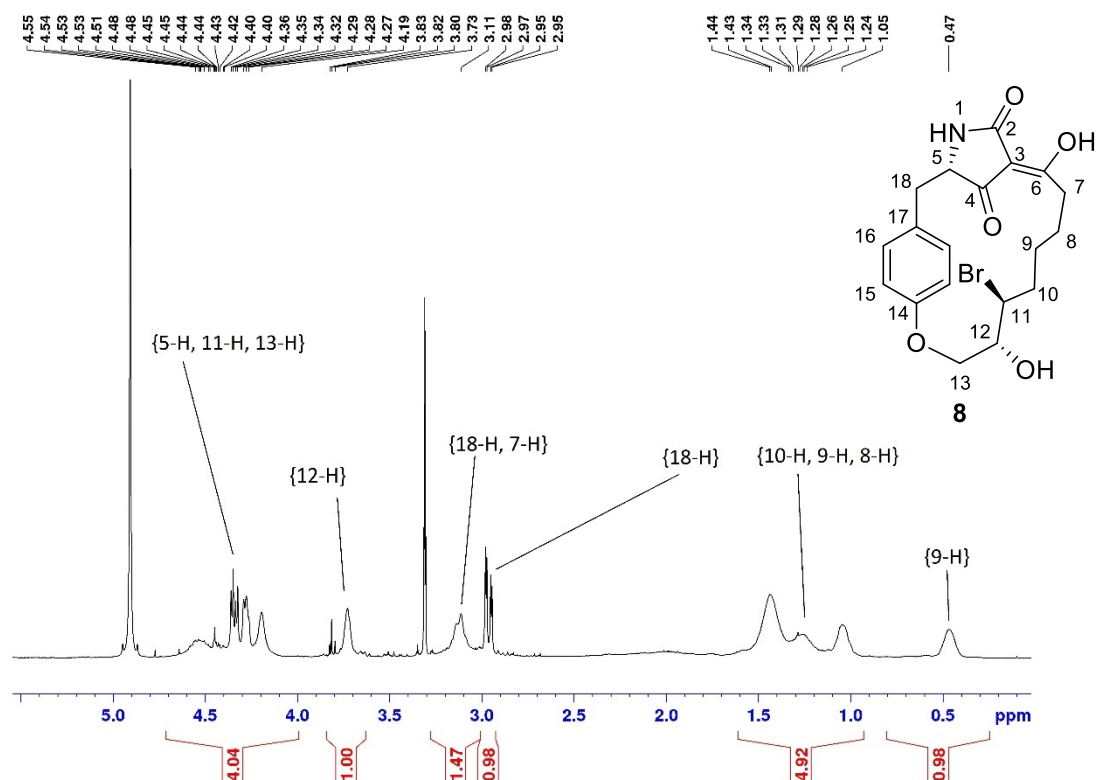

Figure S39.  $^1\text{H}$ -NMR spectrum of compound **8** between 5.5 ppm and 0.0 ppm in  $\text{CD}_3\text{OD}$  with assignment of signals.

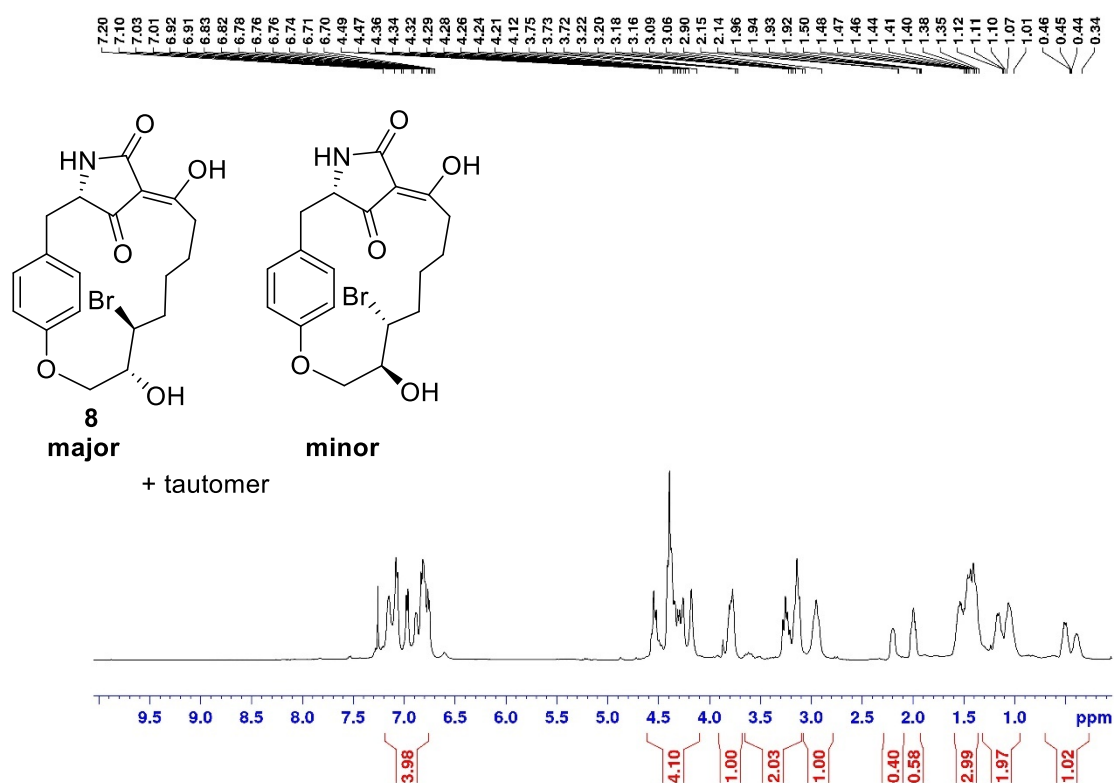

Figure S40.  $^1\text{H}$ -NMR spectrum of compound **8** in  $\text{CDCl}_3$ .

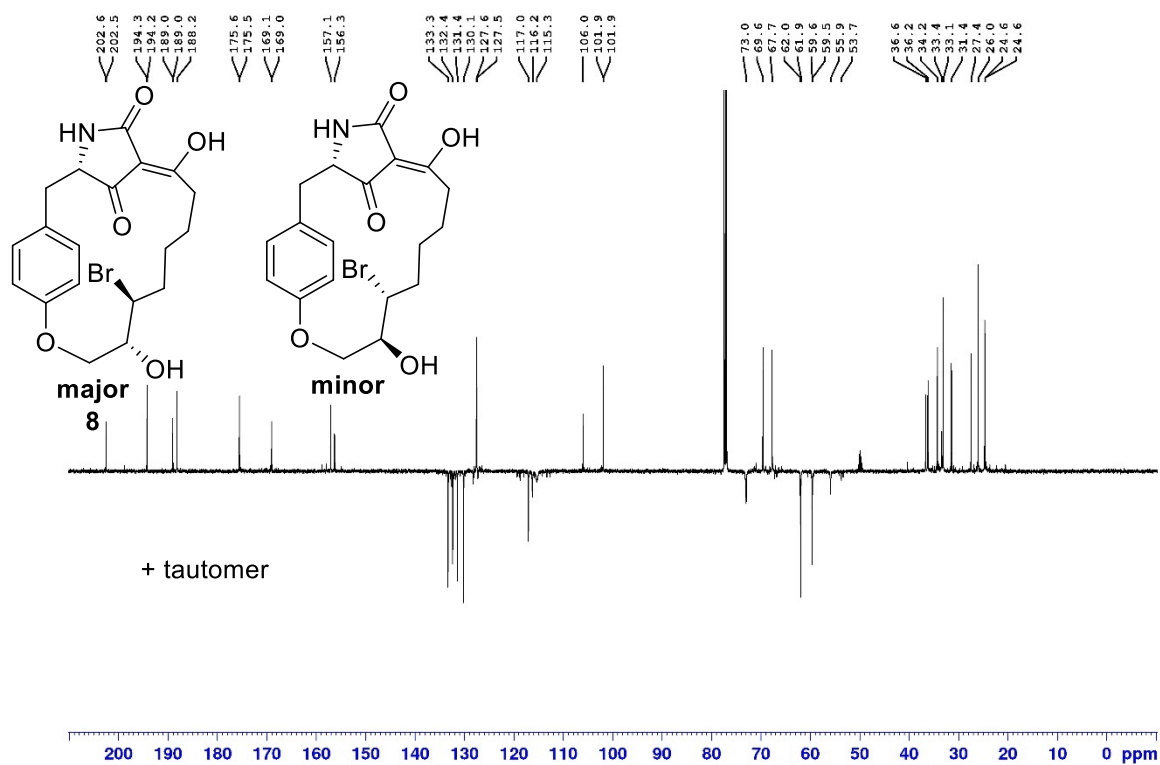

Figure S41.  $^{13}\text{C}$ -NMR spectrum of compound **8** in  $\text{CDCl}_3$ .

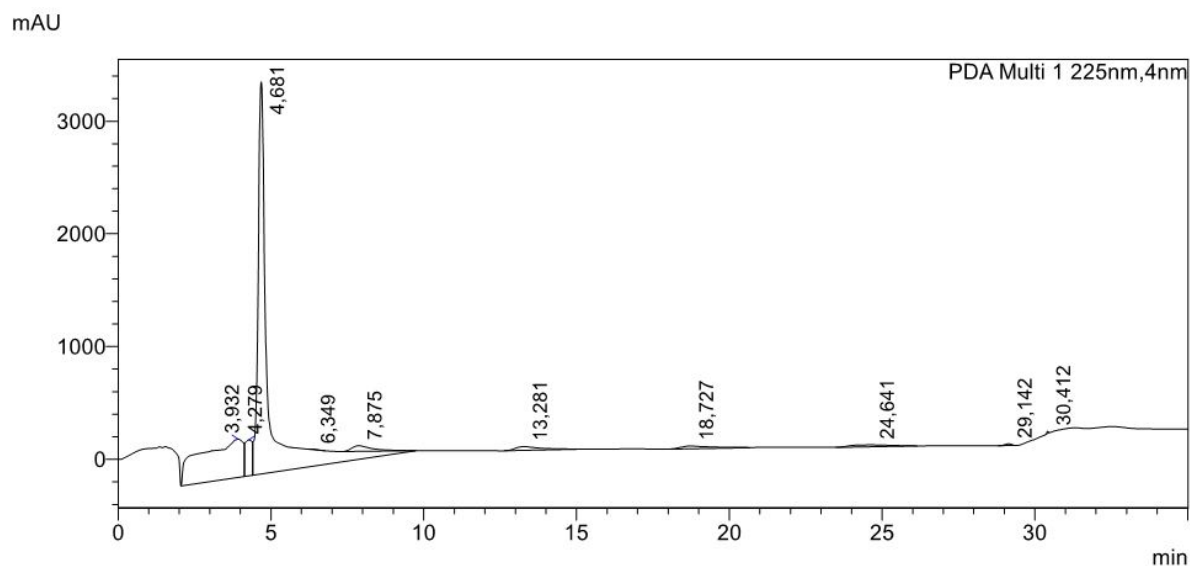

**Figure S42.** Chromatogram of compound **8**. HPLC: *Shimadzu Nexera XR*, Autosampler *SIL-20A*, diode array detector *SPD-M20A*, C18-column (150 × 4 mm). Method: 30% MeCN in H<sub>2</sub>O + 0.1% HCOOH → 35% MeCN in H<sub>2</sub>O + 0.1% HCOOH → 40% MeCN in H<sub>2</sub>O + 0.1% HCOOH → 45% MeCN in H<sub>2</sub>O + 0.1% HCOOH → 50% MeCN in H<sub>2</sub>O + 0.1% HCOOH → 97% MeCN in H<sub>2</sub>O + 0.1% HCOOH, flow: 1.0 mL/min.

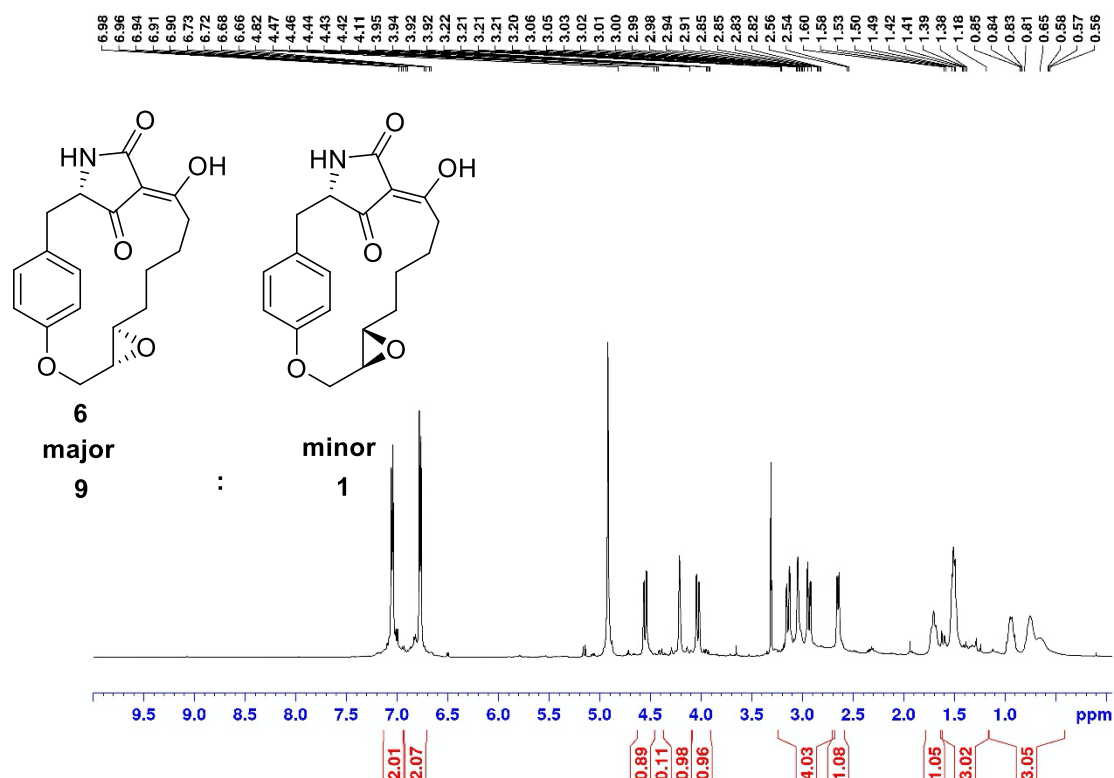

**Figure S43.** <sup>1</sup>H-NMR spectrum of compound **6** in CD<sub>3</sub>OD.

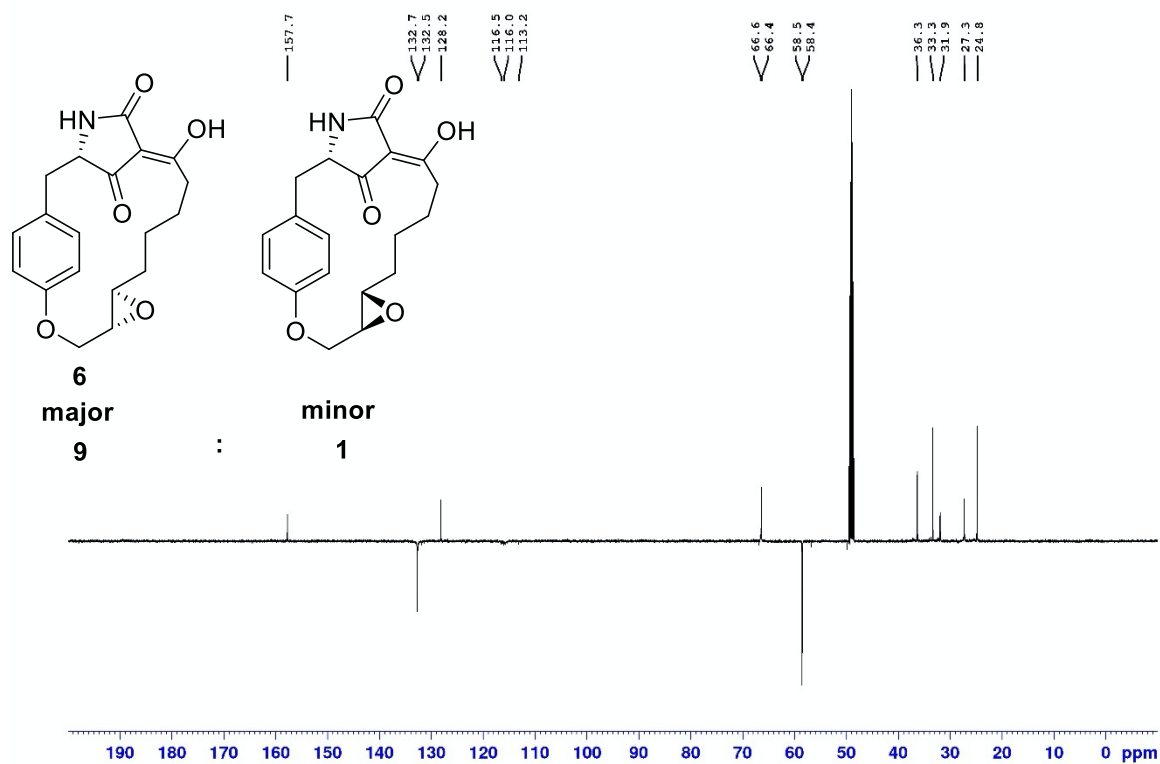

**Figure S44.**  $^{13}\text{C}$ -NMR spectrum of compound **6** in  $\text{CD}_3\text{OD}$ .

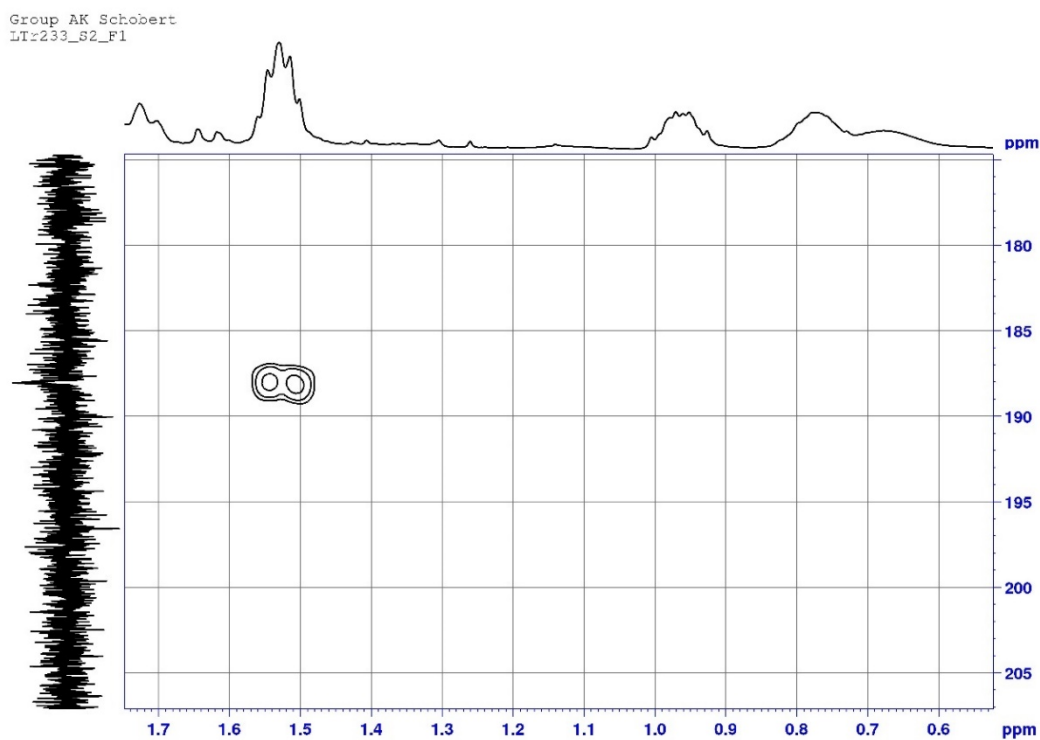

**Figure S45.** Part of HMBC-2D-NMR spectrum of compound **6** in  $\text{CD}_3\text{OD}$ , which was used for peak assignment.

Group AK Schobert  
LTx233\_S2\_F1

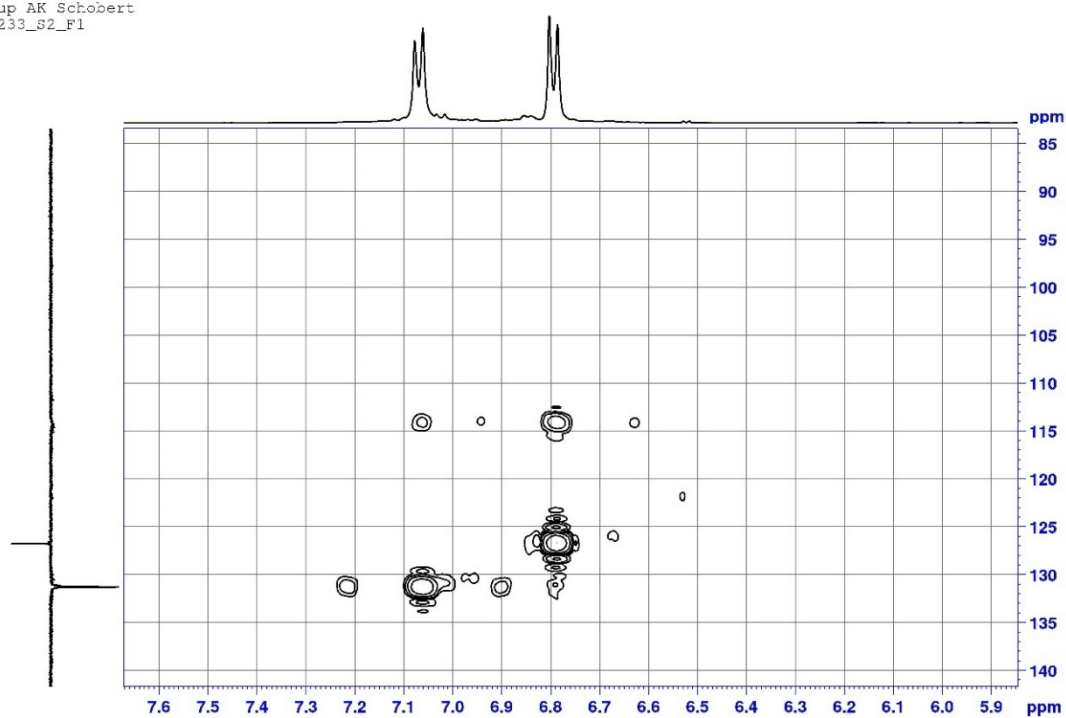

**Figure S46.** Part of HMBC-2D-NMR spectrum of compound **6** in CD<sub>3</sub>OD, which was used for peak assignment.

Group AK Schobert  
LTx233\_S2\_F1

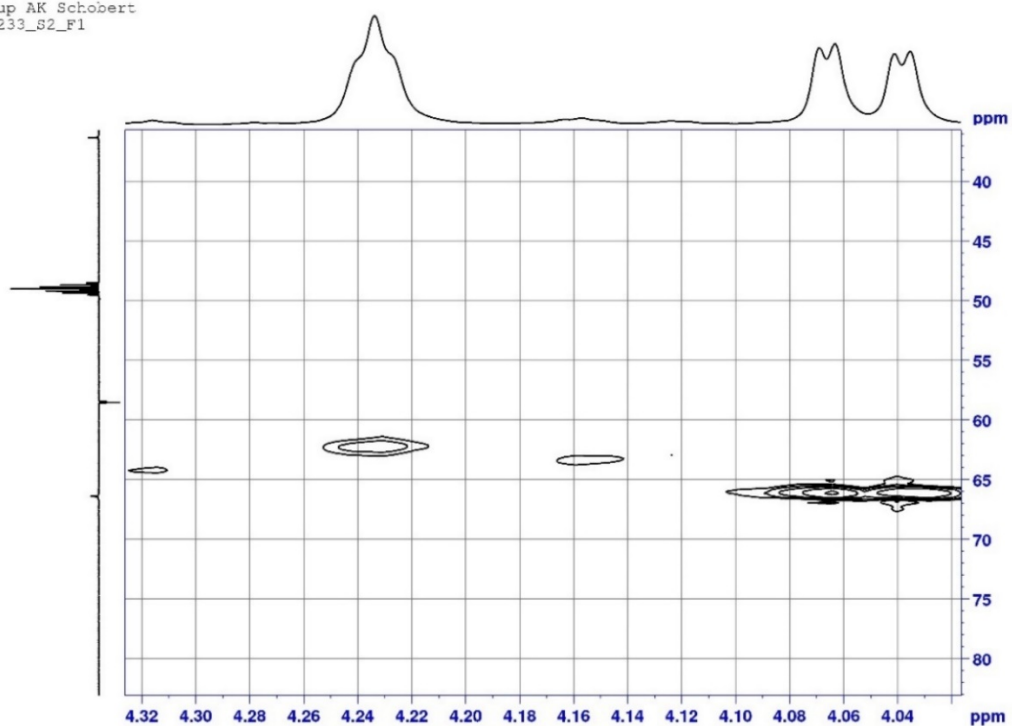

**Figure S47.** Part of HSQC-2D-NMR spectrum of compound **6** in CD<sub>3</sub>OD, which was used for peak assignment.

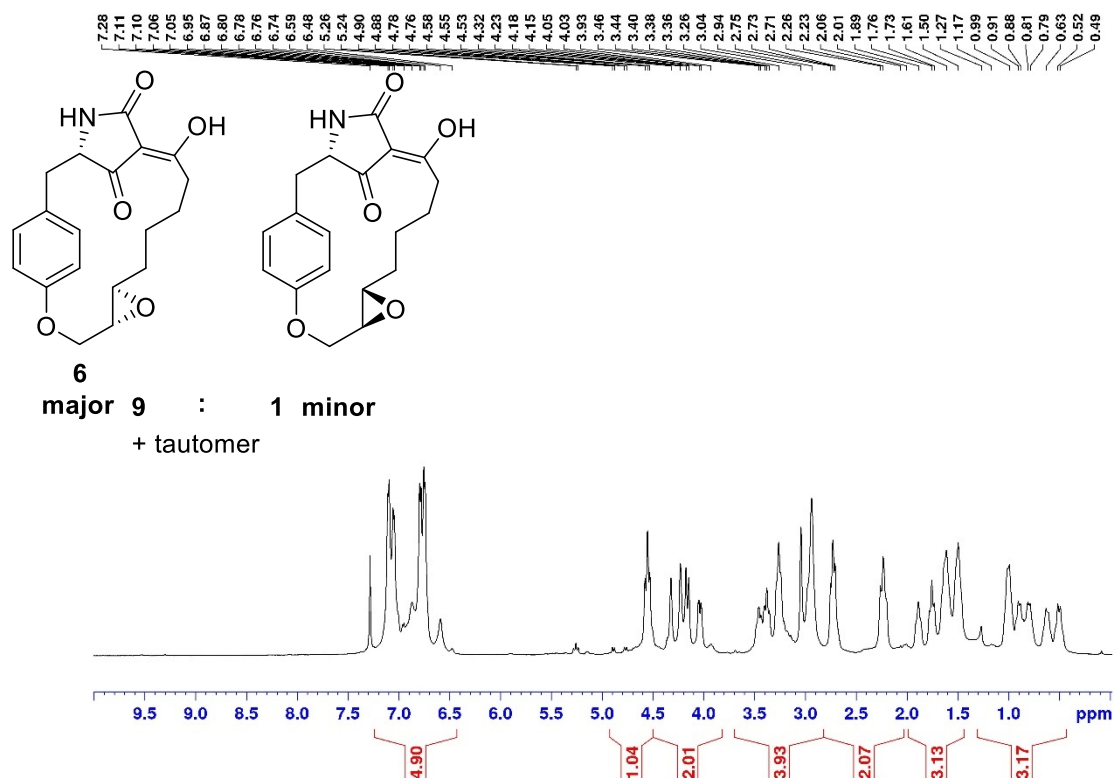

**Figure S48.** <sup>1</sup>H-NMR spectrum of compound **6** in CDCl<sub>3</sub>.

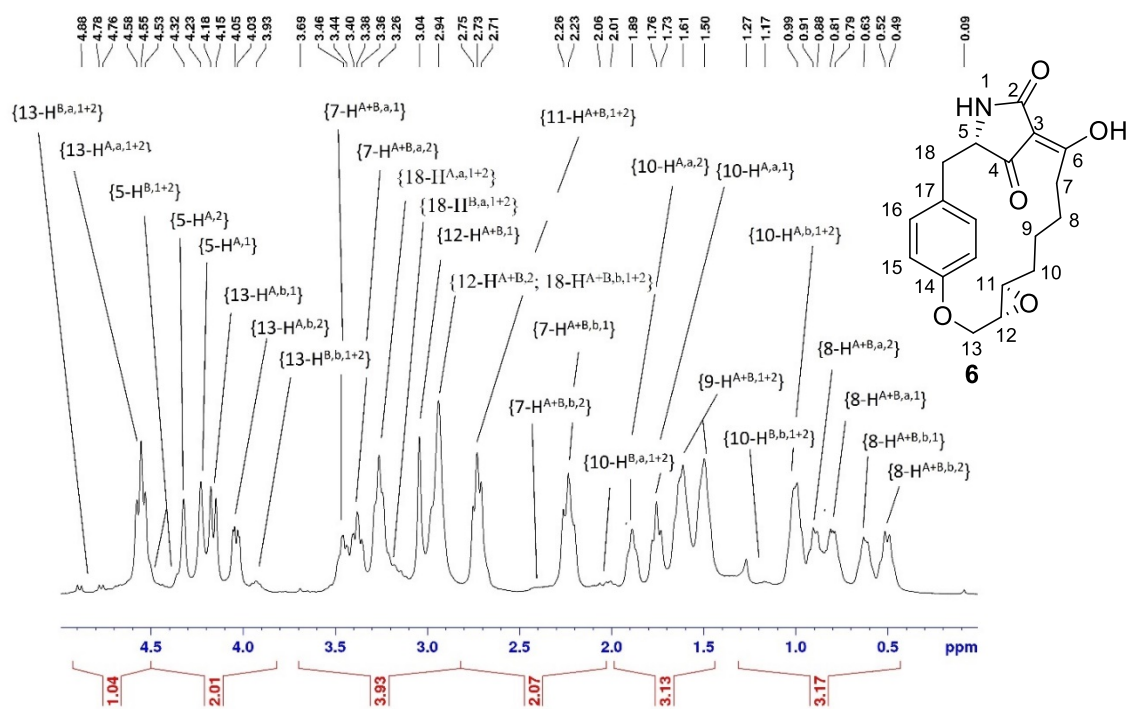

**Figure S49.**  $^1\text{H}$ -NMR spectrum of compound **6** between 5.0 ppm and 0.0 ppm in  $\text{CDCl}_3$  with assignment of signals. Signals of major diastereomer marked as A, signals of minor diastereomer marked as B; diastereotopic H-atoms indicated as a, b; signals of major tautomer marked as 1, signals of minor tautomer marked as 2.

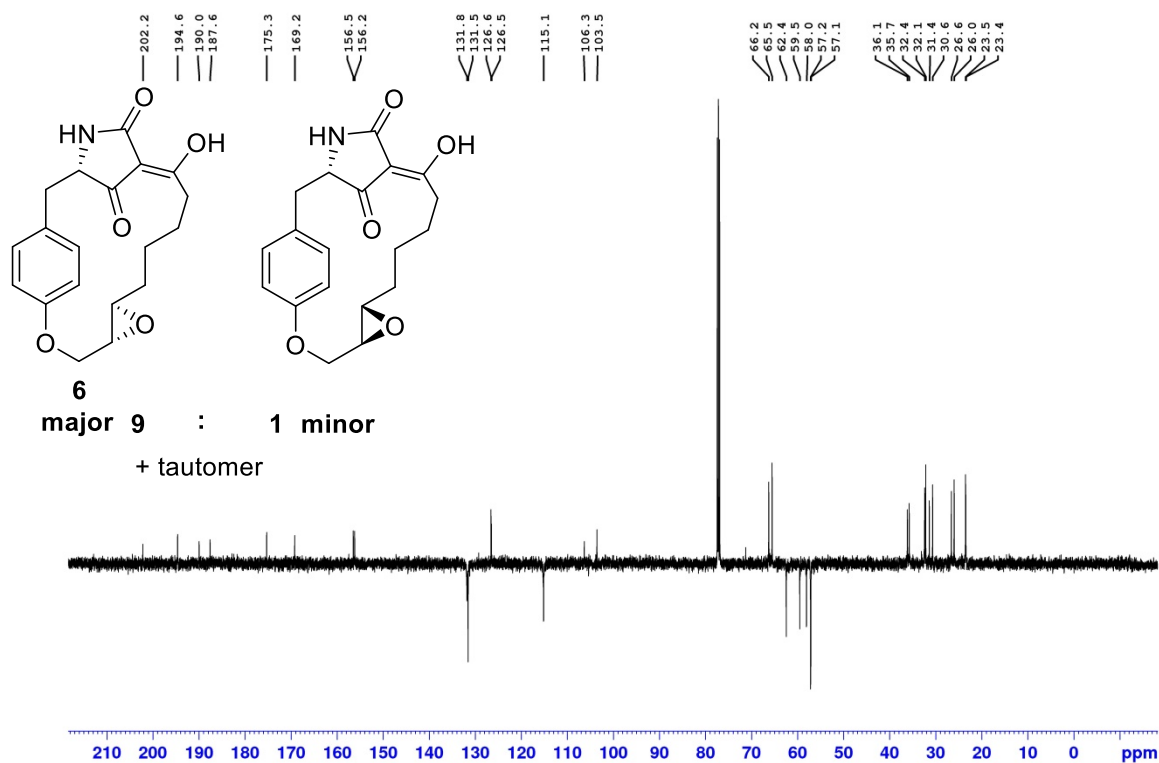

**Figure S50.**  $^{13}\text{C}$ -NMR spectrum of compound **6** in  $\text{CDCl}_3$ .

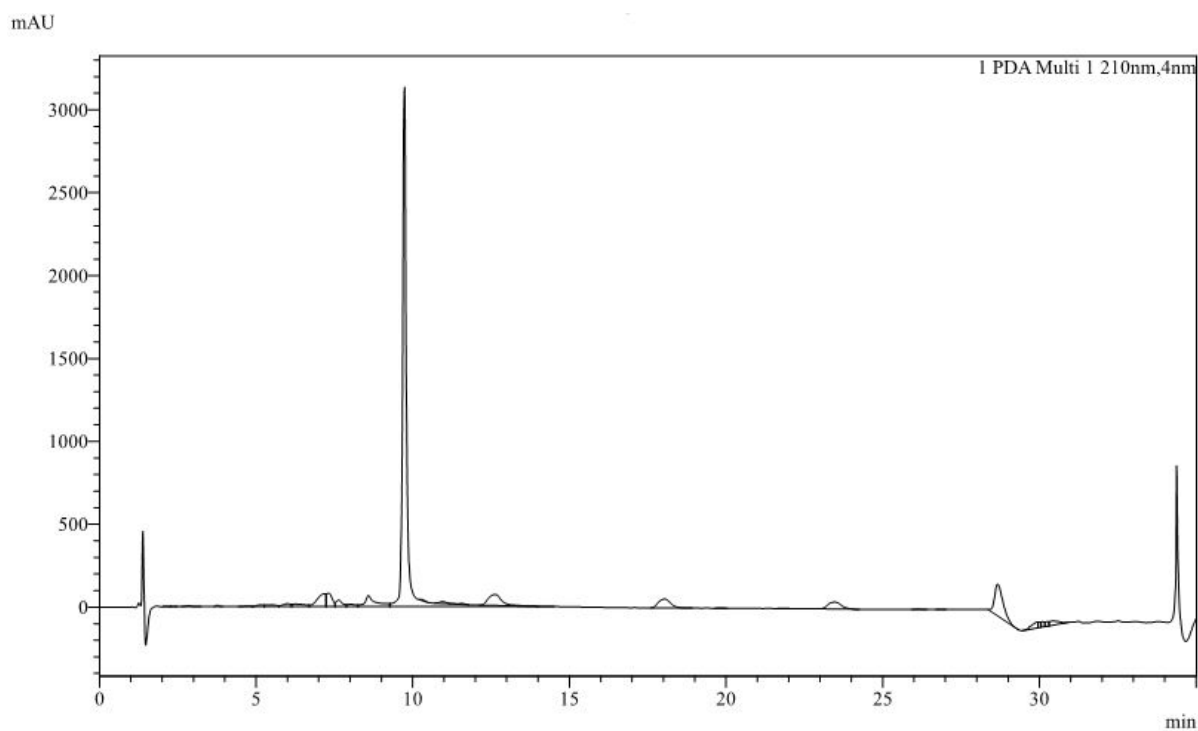

**Figure S51.** Chromatogram of compound **6**. HPLC: *Shimadzu Nexera XR*, Autosampler *SIL-20A*, diode array detector *SPD-M20A*, C18-column (150 × 4 mm). Method: 30% MeCN in H<sub>2</sub>O + 0.1% HCOOH → 35% MeCN in H<sub>2</sub>O + 0.1% HCOOH → 40% MeCN in H<sub>2</sub>O + 0.1% HCOOH → 45% MeCN in H<sub>2</sub>O + 0.1% HCOOH → 50% MeCN in H<sub>2</sub>O + 0.1% HCOOH → 97% MeCN in H<sub>2</sub>O + 0.1% HCOOH, flow: 1.0 mL/min.

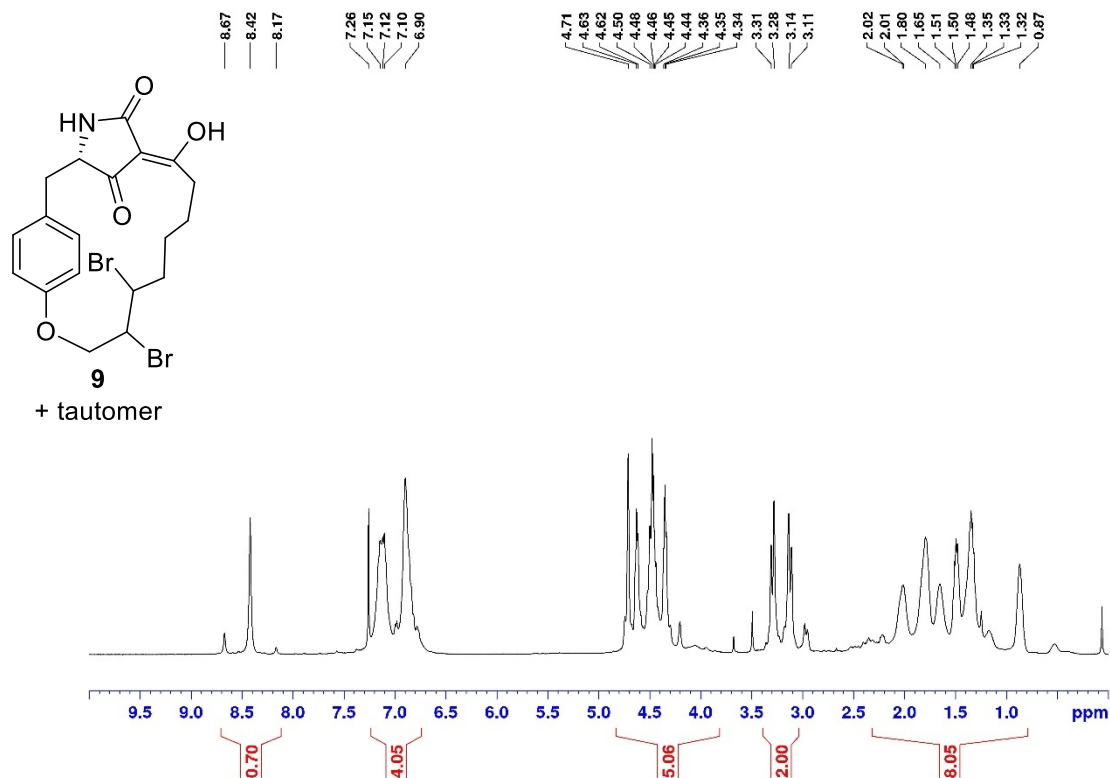

**Figure S52.** <sup>1</sup>H-NMR spectrum of compound **9** in CDCl<sub>3</sub>.



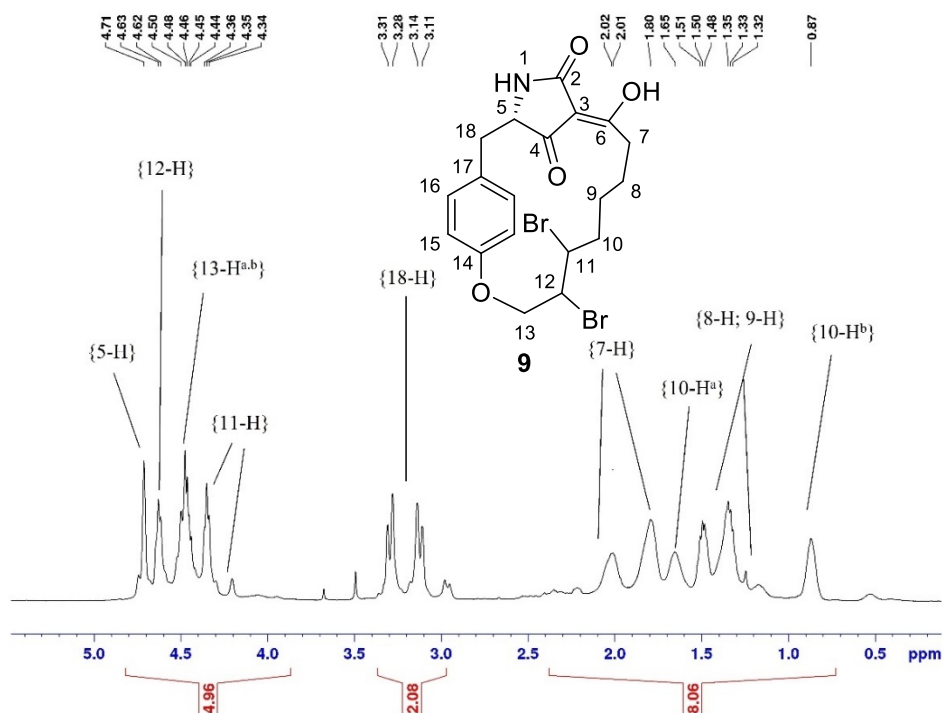

**Figure S53.** <sup>1</sup>H-NMR spectrum of compound **9** between 5.0 ppm and 0.0 ppm in CDCl<sub>3</sub> with assignment of signals. Signals of major diastereomer marked as A, signals of minor diastereomer marked as B; diastereotopic H-atoms indicated as a, b; signals of major tautomer marked as 1, signals of minor tautomer marked as 2.

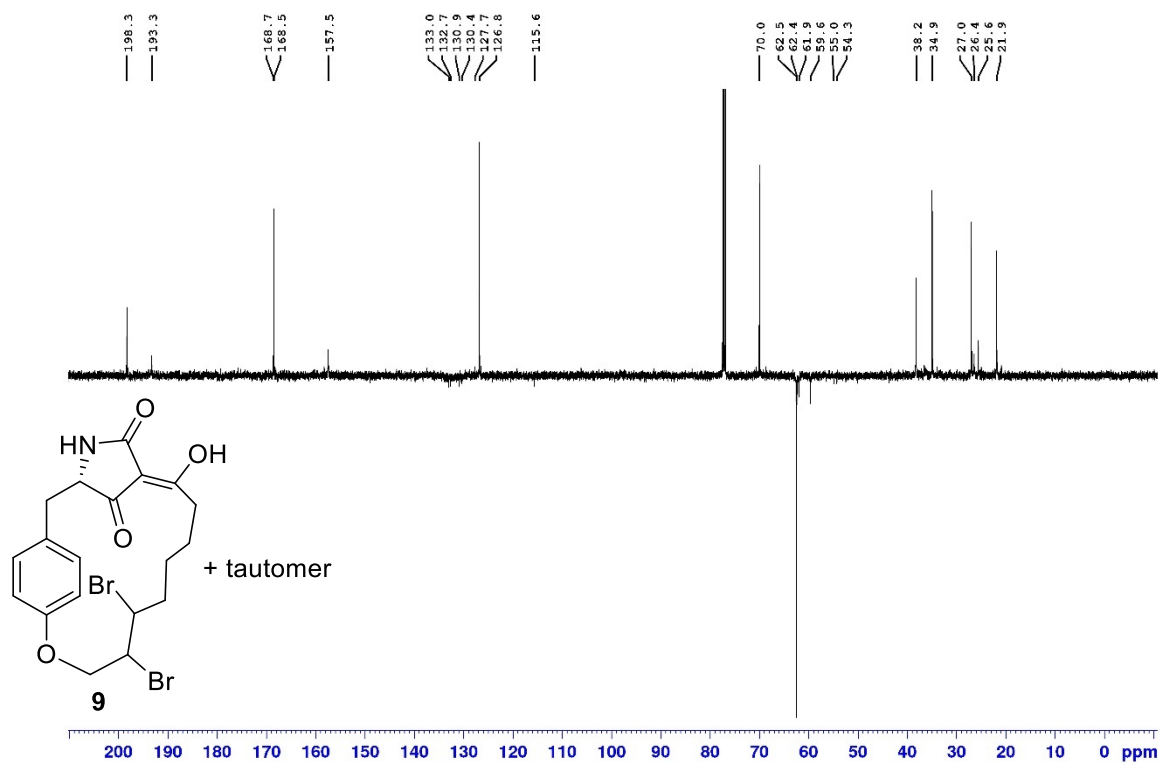

**Figure S54.** <sup>13</sup>C-NMR spectrum of compound **9** in CDCl<sub>3</sub>.

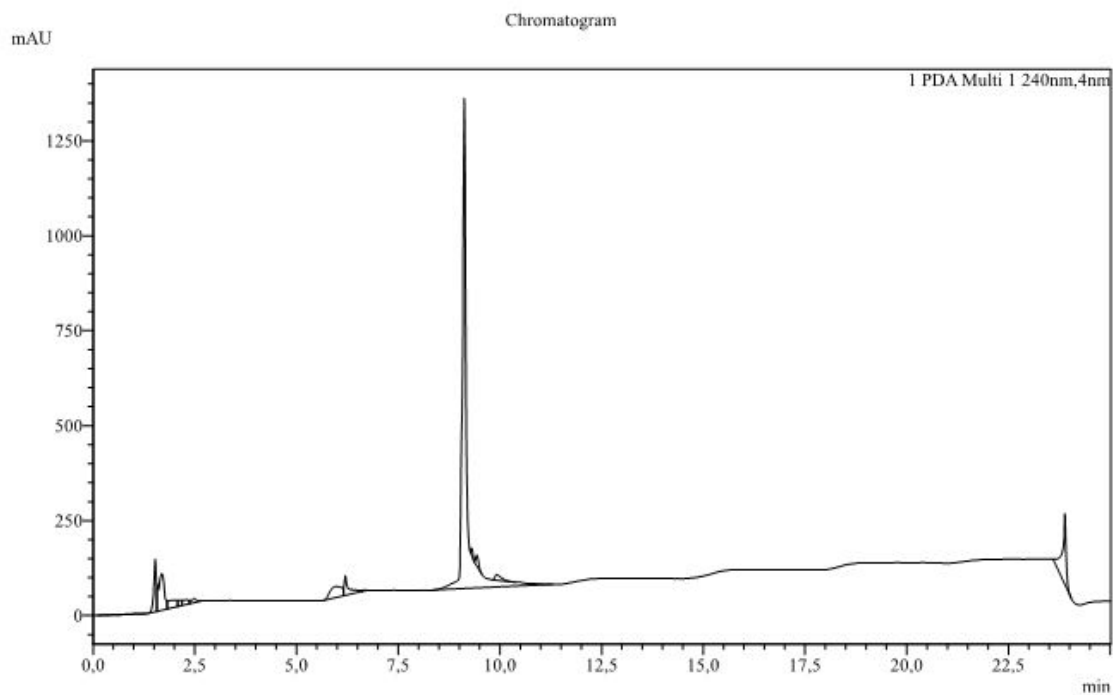

**Figure S55.** Chromatogram of compound **9**. HPLC: *Shimadzu Nexera XR*, Autosampler *SIL-20A*, diode array detector *SPD-M20A*, C18-column (150 × 4 mm). Method: 40% MeCN in H<sub>2</sub>O + 0.1% HCOOH → 60% MeCN in H<sub>2</sub>O + 0.1% HCOOH → 70% MeCN in H<sub>2</sub>O + 0.1% HCOOH → 80% MeCN in H<sub>2</sub>O + 0.1% HCOOH → 90% MeCN in H<sub>2</sub>O + 0.1% HCOOH → 95% MeCN in H<sub>2</sub>O + 0.1% HCOOH → 97% MeCN in H<sub>2</sub>O + 0.1% HCOOH, flow: 1.0 mL/min.

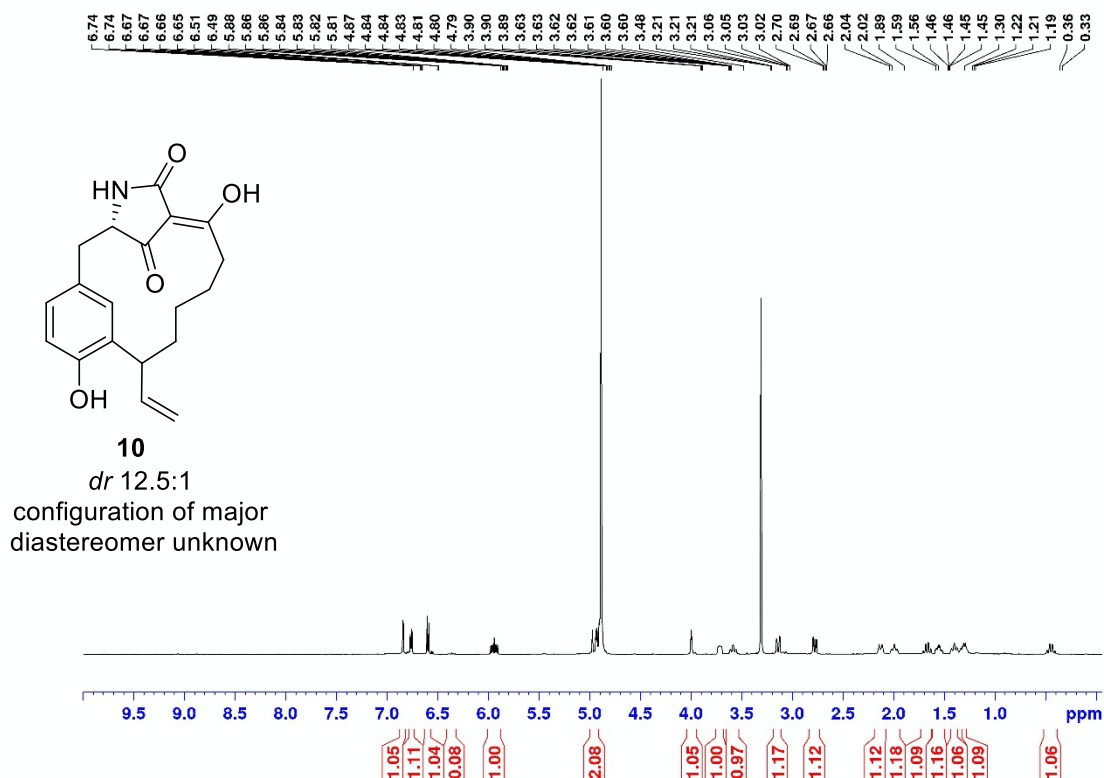

**Figure S56.** <sup>1</sup>H-NMR spectrum of compound **10** in CD<sub>3</sub>OD.

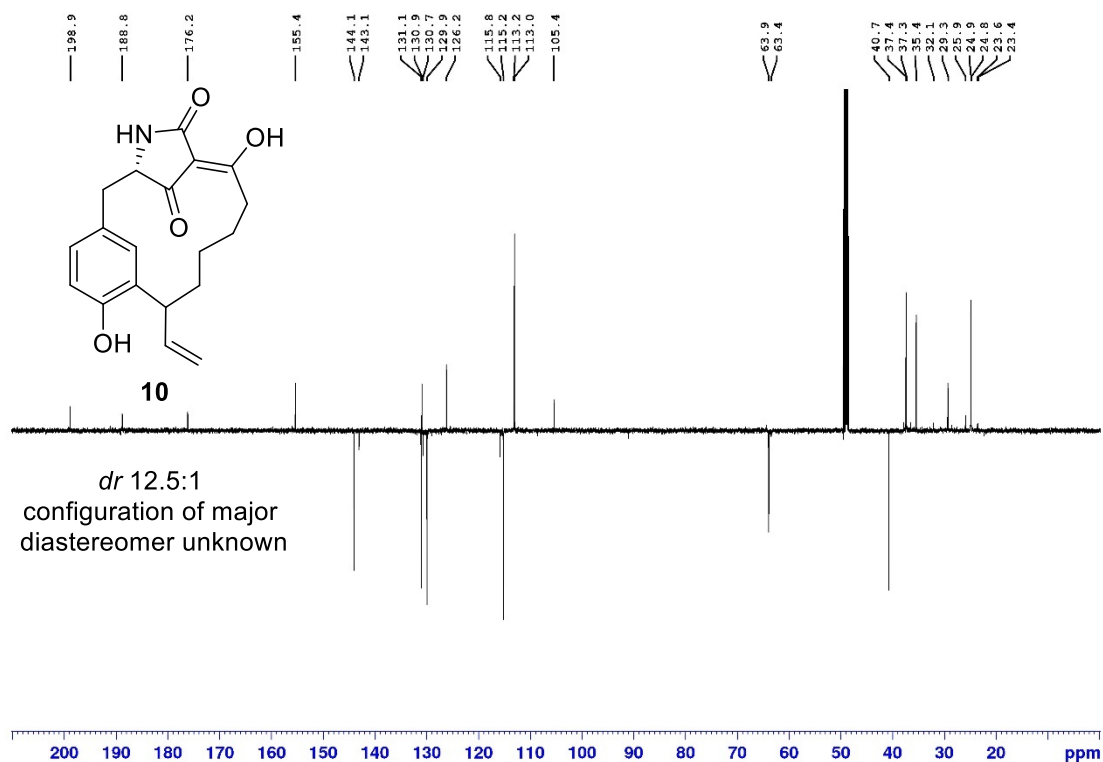

**Figure S57.**  $^{13}\text{C}$ -NMR spectrum of compound **10** in  $\text{CD}_3\text{OD}$ .

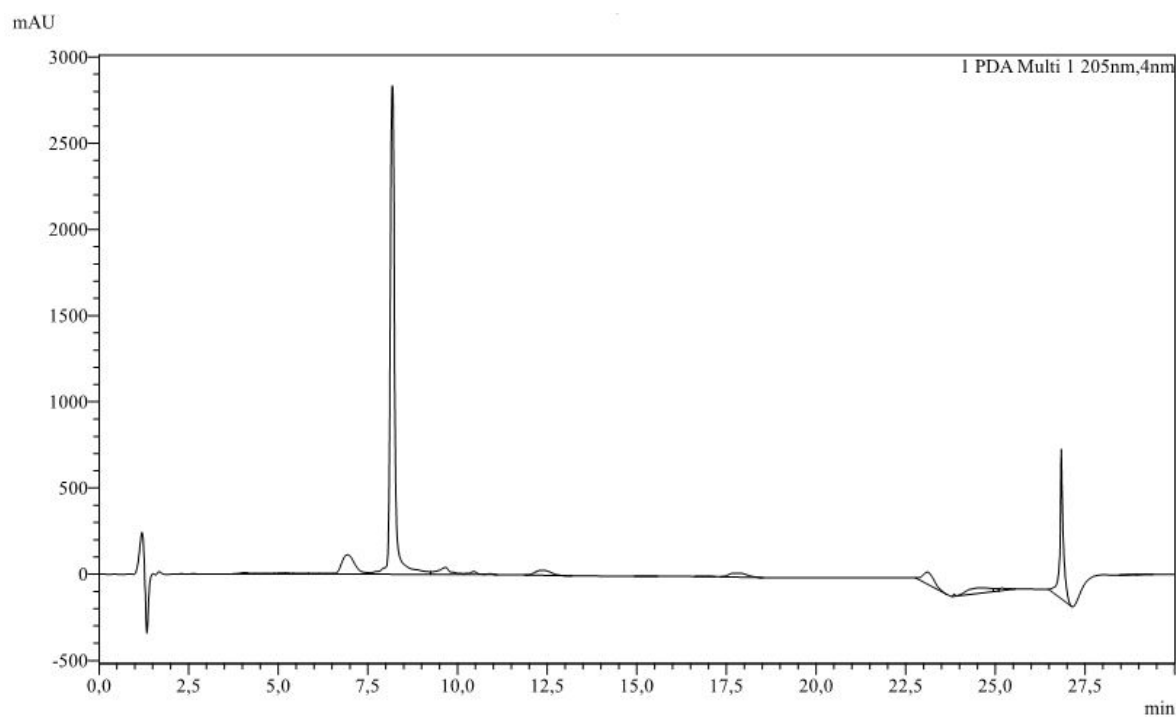

**Figure S58.** Chromatogram of compound **10**. HPLC: *Shimadzu Nexera XR*, Autosampler *SIL-20A*, diode array detector *SPD-M20A*, C18-column ( $150 \times 4$  mm). Method: 40% MeCN in  $\text{H}_2\text{O}$  + 0.1% HCOOH  $\rightarrow$  50% MeCN in  $\text{H}_2\text{O}$  + 0.1% HCOOH  $\rightarrow$  55% MeCN in  $\text{H}_2\text{O}$  + 0.1% HCOOH  $\rightarrow$  60% MeCN in  $\text{H}_2\text{O}$  + 0.1% HCOOH  $\rightarrow$  97% MeCN in  $\text{H}_2\text{O}$  + 0.1% HCOOH, flow: 1.0 mL/min.

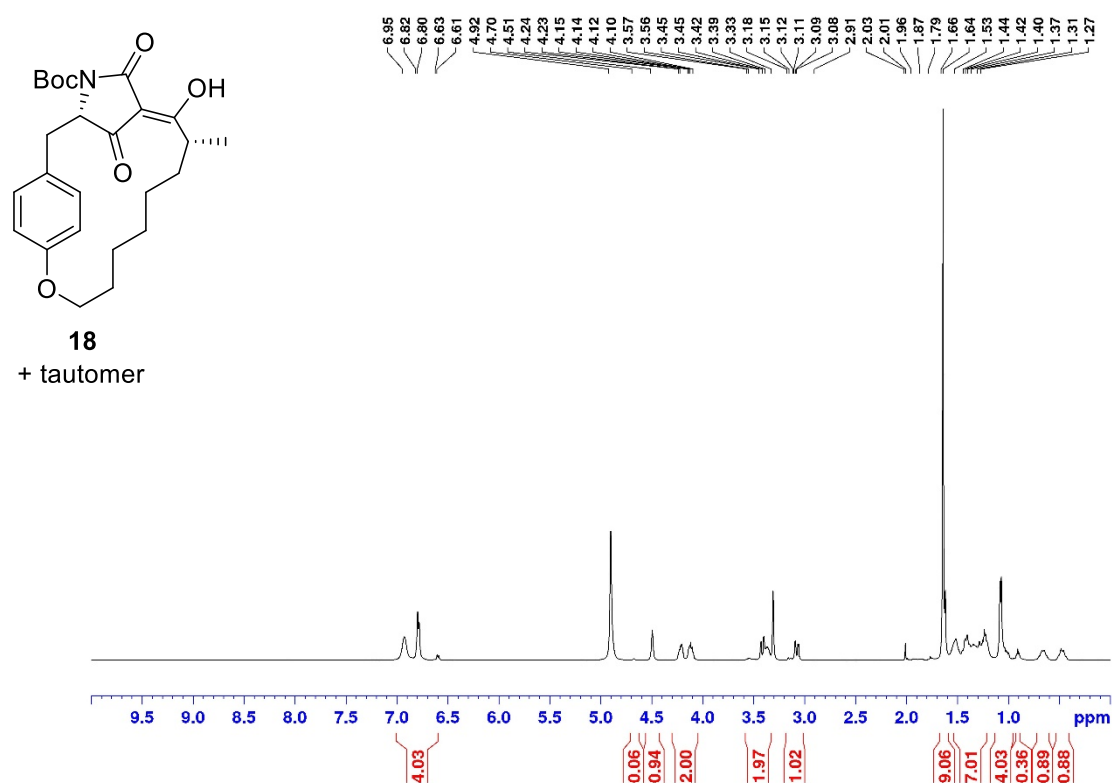

Figure S59.  $^1\text{H}$ -NMR spectrum of compound **18** in  $\text{CD}_3\text{OD}$ .

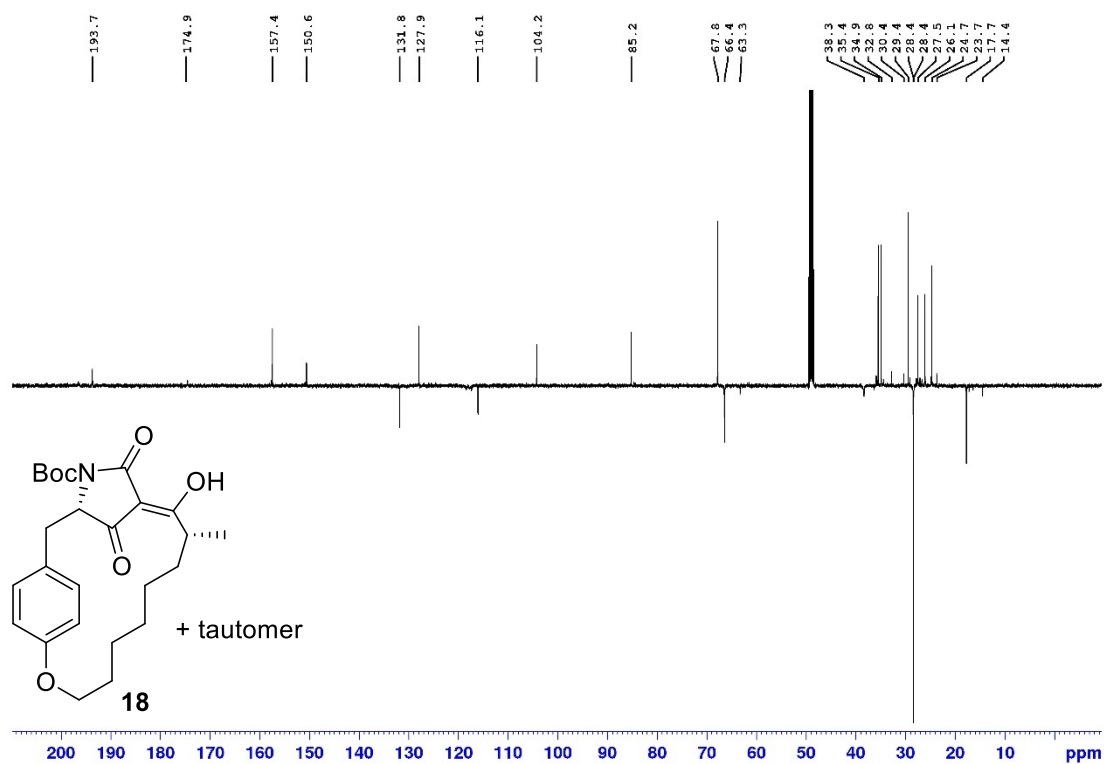

Figure S60.  $^{13}\text{C}$ -NMR spectrum of compound **18** in  $\text{CD}_3\text{OD}$ .

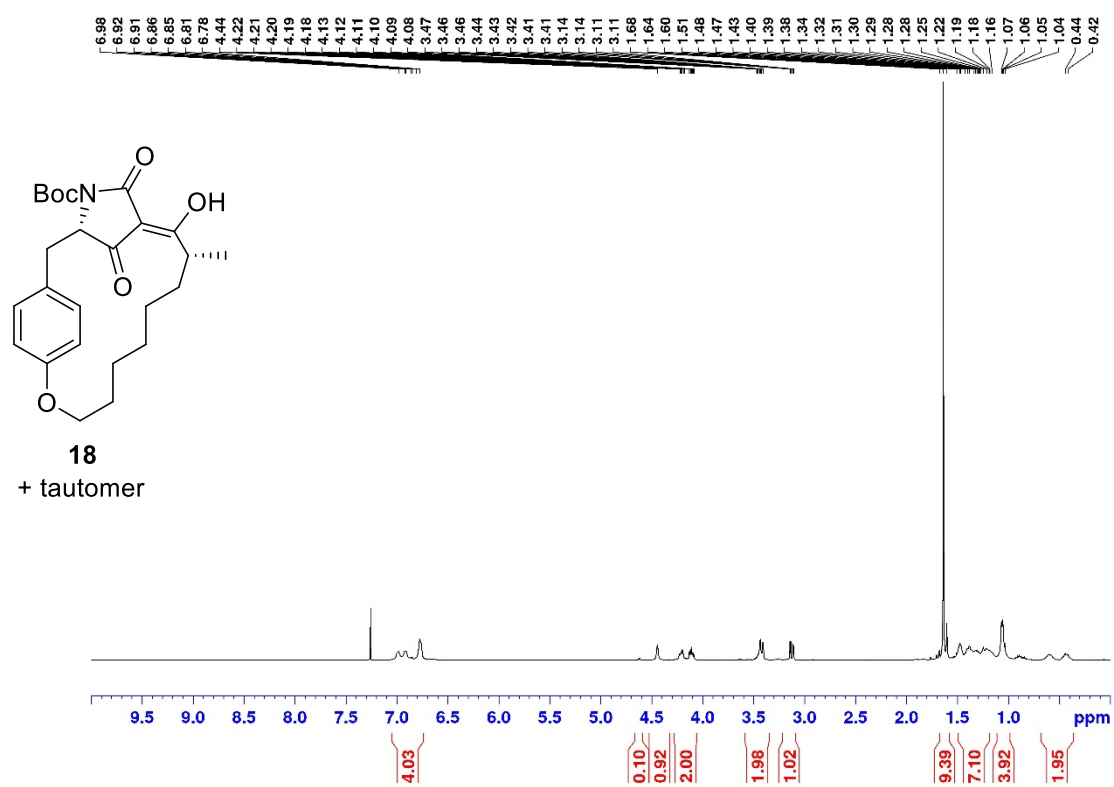

Figure S61.  $^1\text{H}$ -NMR spectrum of compound **18** in  $\text{CDCl}_3$ .

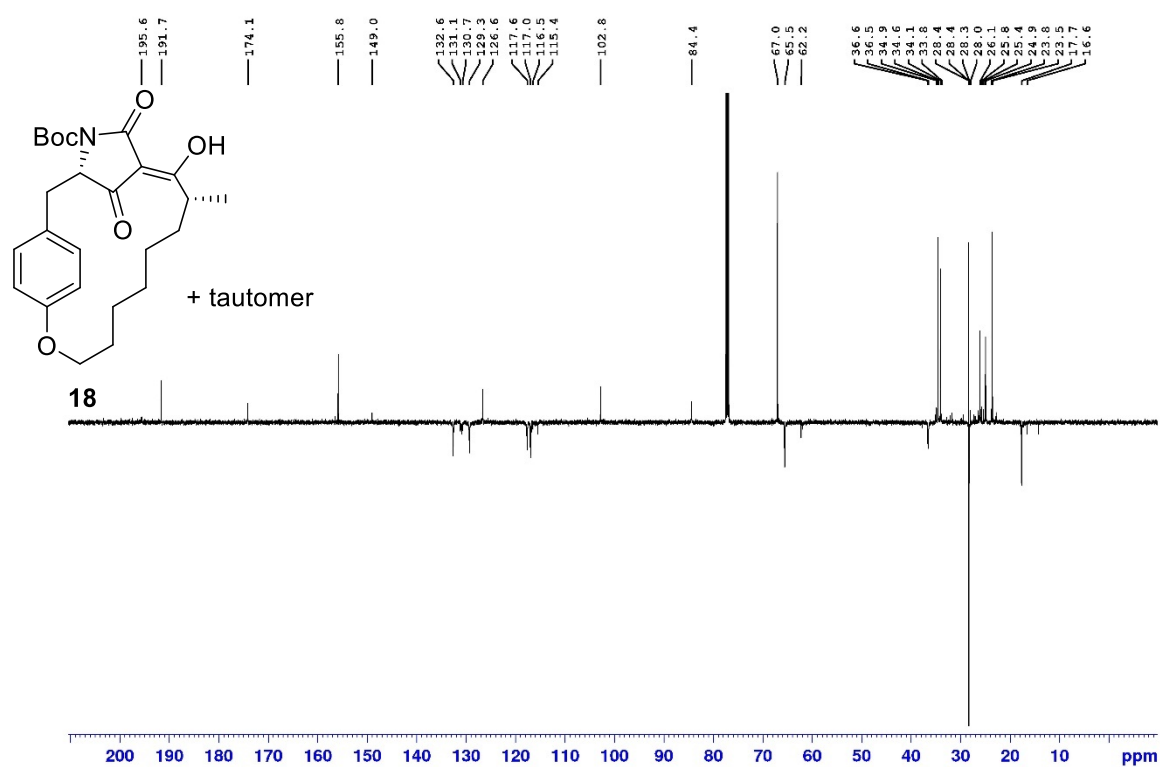

Figure S62.  $^{13}\text{C}$ -NMR spectrum of compound **18** in  $\text{CDCl}_3$ .

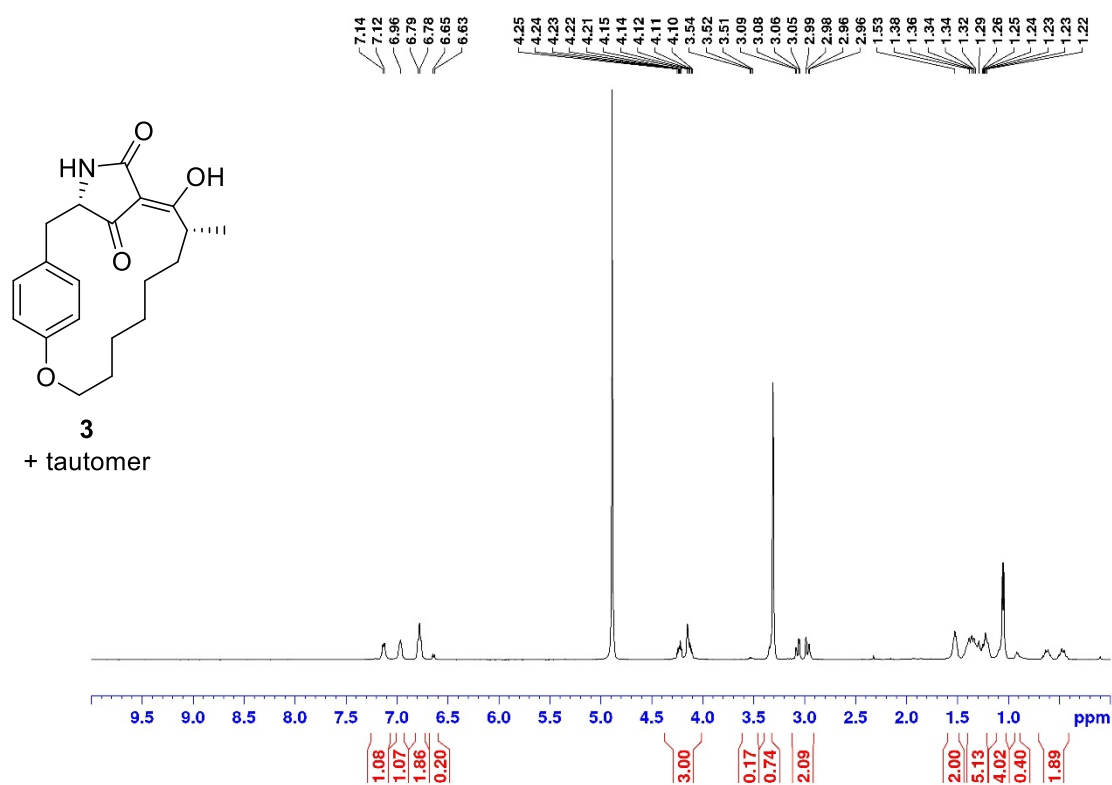

**Figure S63.** <sup>1</sup>H-NMR spectrum of compound **3** in CD<sub>3</sub>OD.

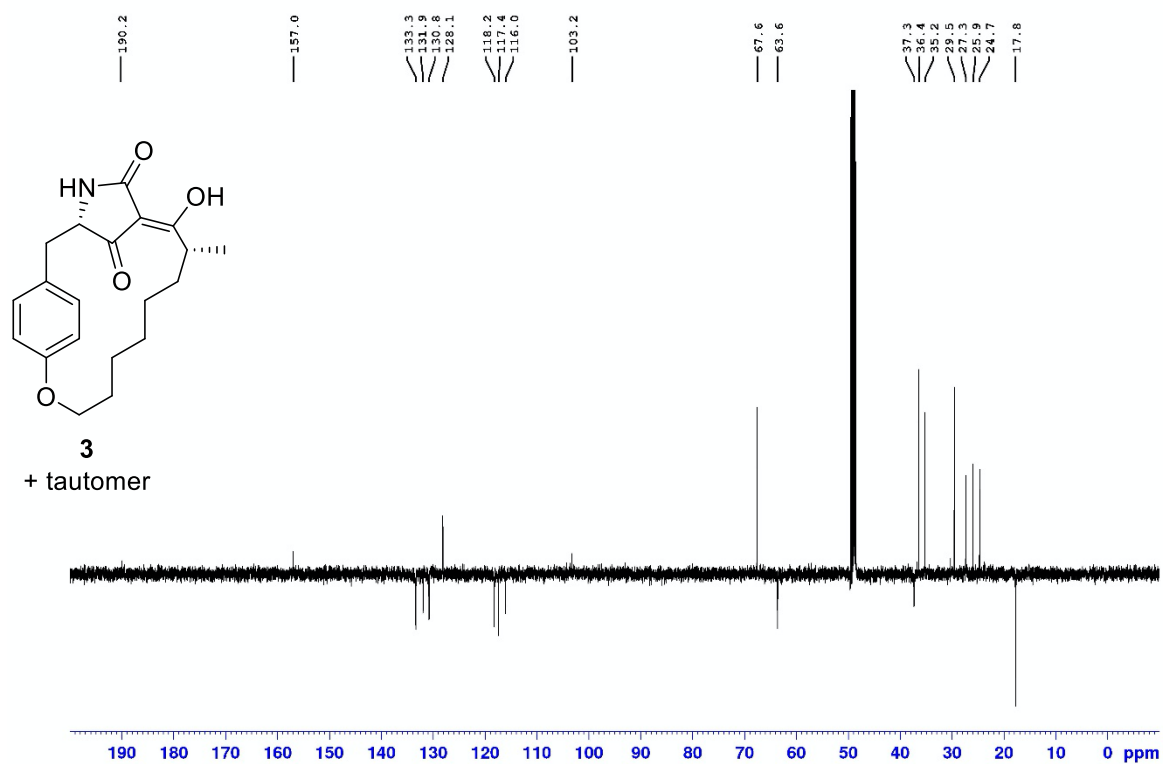

**Figure S64.** <sup>13</sup>C-NMR spectrum of compound **3** in CD<sub>3</sub>OD.

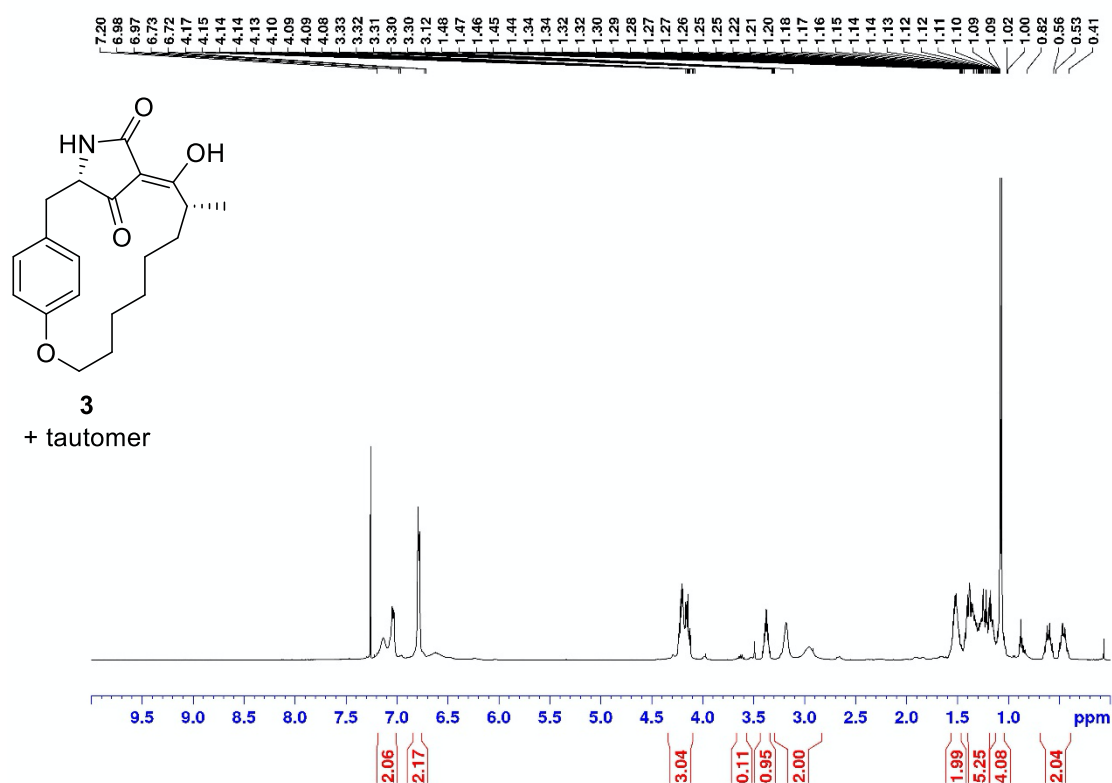

**Figure S65.** <sup>1</sup>H-NMR spectrum of compound **3** in CDCl<sub>3</sub>.

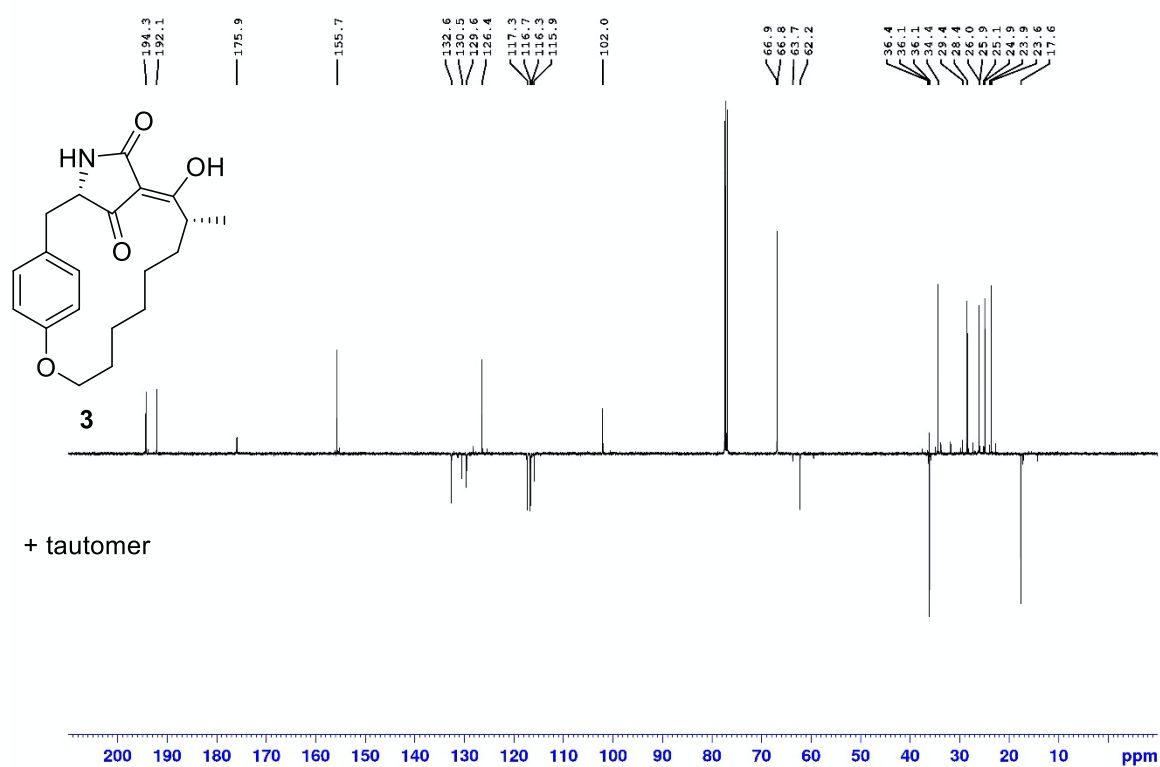

**Figure S66.** <sup>13</sup>C-NMR spectrum of compound **3** in CDCl<sub>3</sub>.



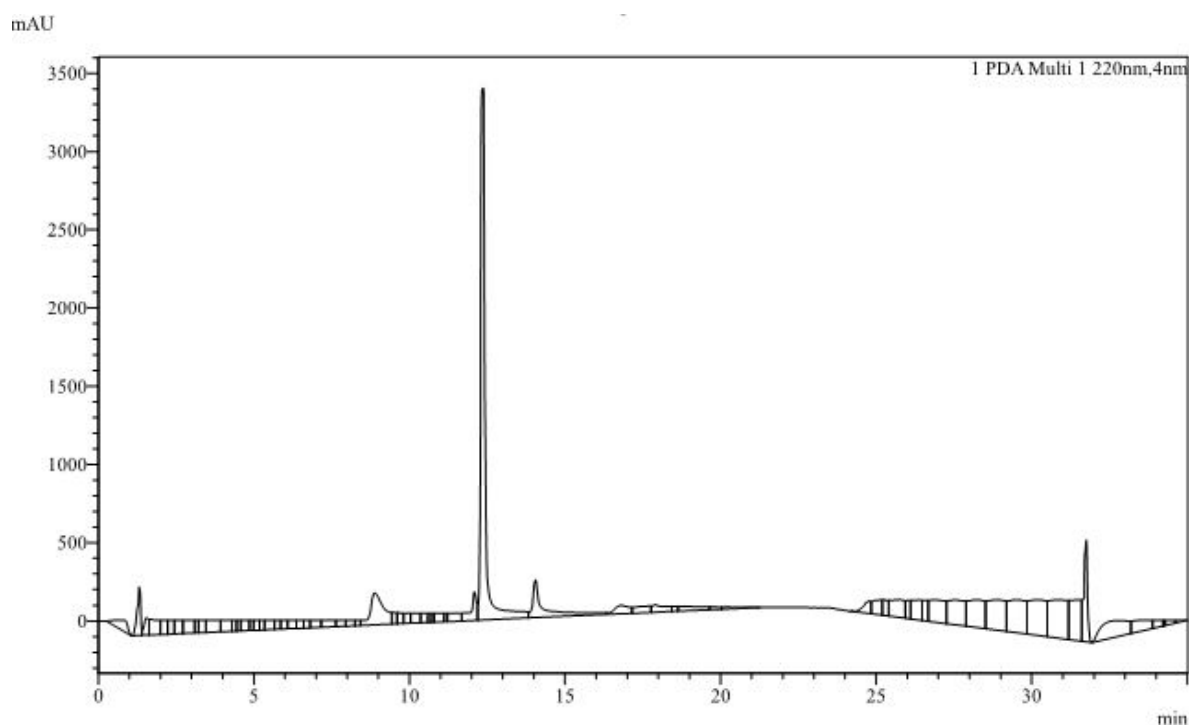

**Figure S67.** Chromatogram of compound **3**. HPLC: *Shimadzu Nexera XR*, Autosampler *SIL-20A*, diode array detector *SPD-M20A*, C18-column (150 × 4 mm). Method: 40% MeCN in H<sub>2</sub>O + 0.1% HCOOH → 60% MeCN in H<sub>2</sub>O + 0.1% HCOOH → 80% MeCN in H<sub>2</sub>O + 0.1% HCOOH → 97% MeCN in H<sub>2</sub>O + 0.1% HCOOH, flow: 1.0 mL/min.

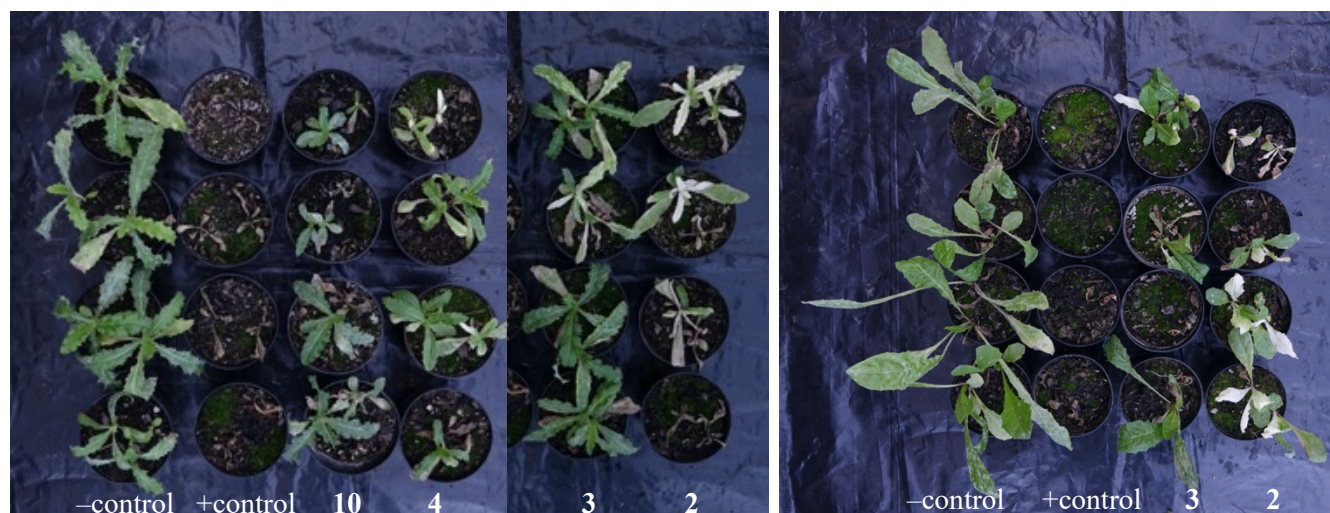

**Figure S68:** Thistles (left) and dandelions (right), 28 d after treatment with compounds **10** (150 mM), **4** (150 mM), **3** (100 mM) and **2** (100 mM). Negative control: isopropanol:water = 1:1 + 0.25% Tween20; positive control: commercial herbicide diflufenican (1.2 mM).



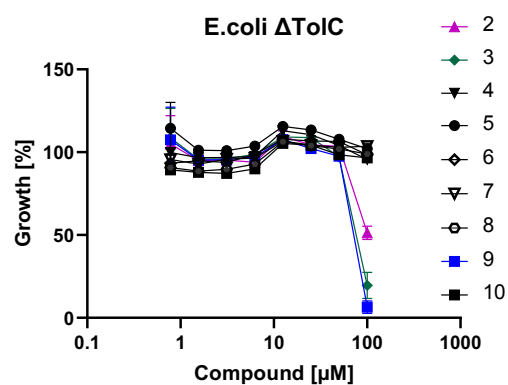

**Figure S69.** Growth inhibitory effects of various concentrations of macrocidin derivatives on *E. coli*  $\Delta TolC$  cultures.

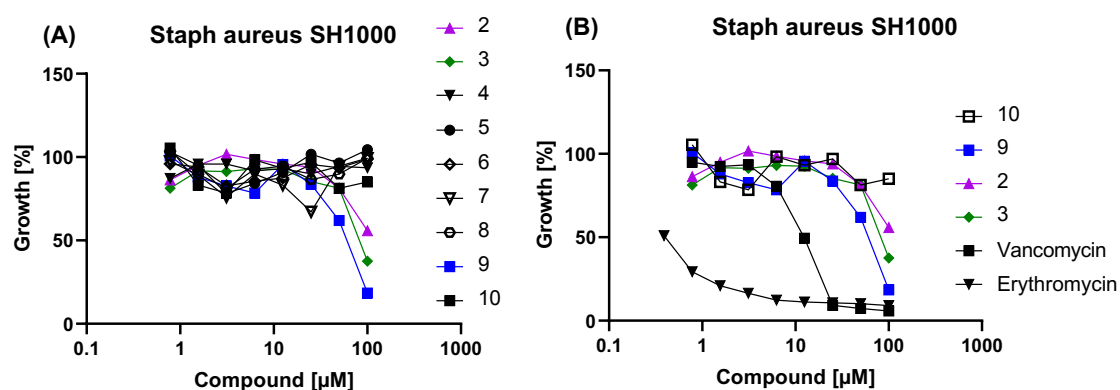

**Figure S70.** Growth inhibitory effects of various concentrations of (A) all macrocidinoids and of (B) the most active macrocidin derivatives 2, 3 and 9, and vancomycin and erythromycin on *S. aureus* (SH1000) cultures.

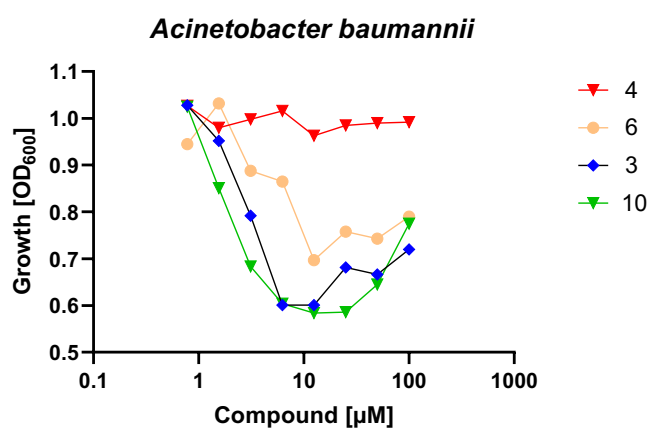

**Figure S71.** Growth inhibitory effects of various concentrations of selected macrocidin derivatives on *Acinetobacter baumannii* cultures.

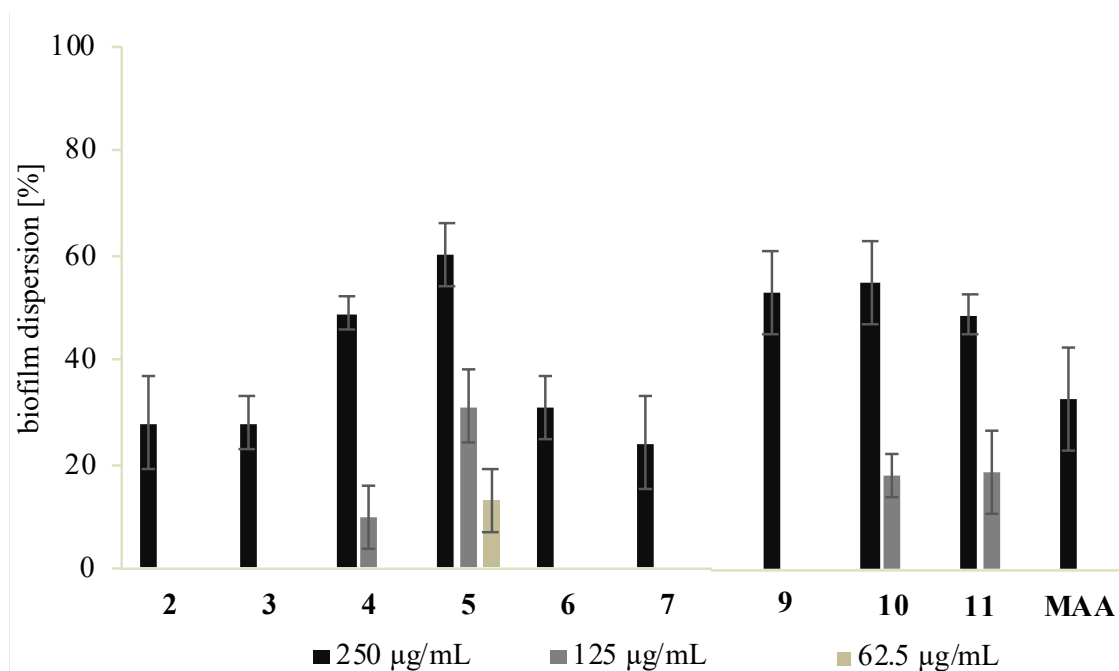

**Figure S72.** Dispersal effects on preformed biofilms of *C. albicans* by compounds **2-7** and **9-11** at various concentrations, error bars indicate SD.

**Table S1.** Antibacterial effects of compounds **2-10** on *E. coli*  $\Delta$ TolC and *S. aureus*. Inhibitory concentrations IC<sub>50</sub> [µM] as determined by the broth microdilution method [ref. 21 and section 4. Materials and methods].

| Compound   | <i>Escherichia coli</i> $\Delta$ TolC<br>[µM] | <i>Staphylococcus aureus</i> SH1000<br>[µM] |
|------------|-----------------------------------------------|---------------------------------------------|
| <b>2</b>   | 100                                           | 100 ± 20                                    |
| <b>3</b>   | 82 ± 15                                       | 83 ± 20                                     |
| <b>4</b>   | inactive                                      | inactive                                    |
| <b>5</b>   | inactive                                      | inactive                                    |
| <b>6</b>   | inactive                                      | inactive                                    |
| <b>7</b>   | inactive                                      | inactive                                    |
| <b>8</b>   | inactive                                      | inactive                                    |
| <b>9</b>   | 75 ± 15                                       | 57 ± 20                                     |
| <b>10</b>  | inactive                                      | inactive                                    |
| Vancomycin |                                               | 12 ± 2                                      |

**Table S2.** Effects of compounds **2-10** on the formation of *S. aureus* biofilms and their dispersive effects on preformed biofilms of *S. aureus* and *C. albicans*, SD values are shown in brackets.

| compounds       | organisms                    | Biofilm inhibition / dispersion effects [%] |           |            |            |            |           |           |         |           |
|-----------------|------------------------------|---------------------------------------------|-----------|------------|------------|------------|-----------|-----------|---------|-----------|
|                 |                              | 250 µg/mL                                   | 125 µg/mL | 62.5 µg/mL | 31.3 µg/mL | 15.6 µg/mL | 7.8 µg/mL | 3.9 µg/mL | 2 µg/mL | 1.3 µg/mL |
| <b>2</b>        | <i>S. aureus</i>             | 85 (±3)                                     | 84 (±3)   | 84 (±2)    | 82 (±1)    | 74 (±1)    | 69 (±2)   | 56 (±4)   | 30 (±5) | 30 (±10)  |
|                 | preformed <i>S. aureus</i>   | 82 (±4)                                     | 85 (±3)   | 82 (±3)    | 74 (±8)    | 49 (±9)    | 30 (±5)   | /         | /       | /         |
|                 | preformed <i>C. albicans</i> | 28 (±9)                                     | /         | /          | /          | /          | /         | /         | /       | /         |
| <b>3</b>        | <i>S. aureus</i>             | 83 (±1)                                     | 79 (±3)   | 80 (±3)    | 80 (±3)    | 81 (±2)    | 74 (±2)   | 53 (±6)   | 36 (±9) | 34 (±9)   |
|                 | preformed <i>S. aureus</i>   | 73 (±4)                                     | 75 (±3)   | 70 (±6)    | 63±14      | 35 (±12)   | 16 (±11)  | /         | /       | /         |
|                 | preformed <i>C. albicans</i> | 28 (±5)                                     | /         | /          | /          | /          | /         | /         | /       | /         |
| <b>4</b>        | <i>S. aureus</i>             | 83 (±1)                                     | 85 (±1)   | 84 (±3)    | 77 (±4)    | 58 (±7)    | 31 (±10)  | 14 (±9)   | 13 (±7) | /         |
|                 | preformed <i>S. aureus</i>   | 76 (±7)                                     | 68 (±12)  | 49 (±13)   | 14 (±10)   | /          | /         | /         | /       | /         |
|                 | preformed <i>C. albicans</i> | 49 (±3)                                     | 10 (±6)   | /          | /          | /          | /         | /         | /       | /         |
| <b>5</b>        | <i>S. aureus</i>             | 82 (±3)                                     | 81 (±4)   | 77 (±3)    | 65 (±10)   | 35 (±10)   | 15 (±10)  | /         | /       | /         |
|                 | preformed <i>S. aureus</i>   | 77 (±8)                                     | 64 (±13)  | 36 (±12)   | 23 (±2)    | /          | /         | /         | /       | /         |
|                 | preformed <i>C. albicans</i> | 60±6                                        | 31 (±7)   | 13 (±6)    | /          | /          | /         | /         | /       | /         |
| <b>6</b>        | <i>S. aureus</i>             | 82 (±3)                                     | 56 (±3)   | 17 (±8)    | /          | /          | /         | /         | /       | /         |
|                 | preformed <i>S. aureus</i>   | 25 (±11)                                    | /         | /          | /          | /          | /         | /         | /       | /         |
|                 | preformed <i>C. albicans</i> | 31 (±6)                                     | /         | /          | /          | /          | /         | /         | /       | /         |
| <b>7</b>        | <i>S. aureus</i>             | /                                           | /         | /          | /          | /          | /         | /         | /       | /         |
|                 | preformed <i>S. aureus</i>   | /                                           | /         | /          | /          | /          | /         | /         | /       | /         |
|                 | preformed <i>C. albicans</i> | /                                           | /         | /          | /          | /          | /         | /         | /       | /         |
| <b>8</b>        | <i>S. aureus</i>             | 76 (±10)                                    | 28 (±10)  | /          | /          | /          | /         | /         | /       | /         |
|                 | preformed <i>S. aureus</i>   | /                                           | /         | /          | /          | /          | /         | /         | /       | /         |
|                 | preformed <i>C. albicans</i> | 53 (±8)                                     | /         | /          | /          | /          | /         | /         | /       | /         |
| <b>9</b>        | <i>S. aureus</i>             | 79 (±4)                                     | 81 (±3)   | 79 (±3)    | 79 (±6)    | 82 (±3)    | 68 (±7)   | 42 (±7)   | 35 (±9) | 24 (±10)  |
|                 | preformed <i>S. aureus</i>   | 73 (±9)                                     | 80 (±4)   | 79 (±4)    | 80 (±4)    | 57 (±3)    | 12 (±10)  | /         | /       | /         |
|                 | preformed <i>C. albicans</i> | 49 (±4)                                     | 19 (±8)   | /          | /          | /          | /         | /         | /       | /         |
| <b>10</b>       | <i>S. aureus</i>             | 82 (±3)                                     | 81 (±4)   | 79 (±3)    | 53 (±7)    | 33 (±8)    | /         | /         | /       | /         |
|                 | preformed <i>S. aureus</i>   | 83 (±4)                                     | 79 (±4)   | 58 (±15)   | 33 (±12)   | /          | /         | /         | /       | /         |
|                 | preformed <i>C. albicans</i> | /                                           | /         | /          | /          | /          | /         | /         | /       | /         |
| <b>MAA</b>      | <i>S. aureus</i>             | 83 (±3)                                     | 82 (±4)   | 82 (±5)    | 80 (±4)    | 81 (±4)    | 77 (±6)   | 40 (±9)   | /       | /         |
|                 | preformed <i>S. aureus</i>   | 68 (±2)                                     | 59 (±12)  | 50 (±4)    | 58 (±8)    | /          | /         | /         | /       | /         |
|                 | preformed <i>C. albicans</i> | 33 (±10)                                    | /         | /          | /          | /          | /         | /         | /       | /         |
| (/) no activity |                              |                                             |           |            |            |            |           |           |         |           |

**Table S3.** Inhibitory concentrations IC<sub>50</sub> [μM] of compounds **2-10** when applied to KBV cervix carcinoma, 518A2 melanoma, HCT-116, HCT-116<sup>p53-/-</sup> knockout mutant colon carcinoma and EaHy hybrid endothelial cells. Compounds were tested in a range from 50 nM to 100 μM. Values are the means ± SD determined in four independent experiments and derived from dose-response curves after 72 h incubation using the MTT assay. [n.d. = not determined]

| IC <sub>50</sub> values [μM] |       |                       |                         |      |        |
|------------------------------|-------|-----------------------|-------------------------|------|--------|
|                              | 518A2 | HCT-116 <sup>wt</sup> | HCT-116 <sup>p53-</sup> | EaHy | KbV    |
| <b>2</b>                     | >50   | 13.9±0.8              | 17.2±2                  | n.d. | 31.3±3 |
| <b>3</b>                     | n.d.  | >50                   | >50                     | n.d. | >50    |
| <b>6</b>                     | n.d.  | >50                   | >50                     | >50  | >50    |
| <b>7</b>                     | >50   | >50                   | >50                     | >50  | >50    |
| <b>8</b>                     | n.d.  | >50                   | >50                     | >50  | >50    |
| <b>9</b>                     | n.d.  | >50                   | >50                     | >50  | >50    |
| <b>10</b>                    | n.d.  | >50                   | >50                     | >50  | >50    |
